# Supplementary material for: Computational analysis of 140 years of US political speeches reveals more positive but increasingly polarized framing of immigration
Source: PubMed Central journal article supplement (PMC9351383; doi:10.1073/pnas.2120510119), 2022-07-29
Supplement: pnas.2120510119.sapp.pdf [file pnas.2120510119.sapp.pdf]

1

## 2 **Supplementary Information for**

### 3 **Computational Analysis of 140 Years of U.S. Political Speeches Reveals More Positive but** 4 **Increasingly Polarized Framing of Immigration**

5 **Dallas Card, Serina Chang, Chris Becker, Julia Mendelsohn, Rob Voigt, Leah Boustan, Ran Abramitzky, Dan Jurafsky**

6 **Dallas Card.**

7 **E-mail: [dalc@umich.edu](mailto:dalc@umich.edu)**

#### 8 **This PDF file includes:**

9     Supplementary text

10    Figs. S1 to S35 (not allowed for Brief Reports)

11    Tables S1 to S12 (not allowed for Brief Reports)

12    SI References

## 13 Supporting Information Text

14 This document contains additional details on data processing, along with additional figures, analyses, and validity checks.

## 15 Accompanying Replication Code and Data

16 Code and data sufficient for replicating the analyses and figures in the main paper, along with code for processing original raw  
17 data, and how to obtain it, are available at <https://github.com/dallascard/us-immigration-speeches/releases/tag/v1.0>

## 18 Details of Data Processing

19 For the Gentzkow et al data (1), all immigration speeches were tokenized with spaCy (<https://spacy.io/>). Because commas have  
20 been converted into periods in the raw data, we rejoin mistakenly split sentences by re-attaching any sentence that begins with  
21 a lower case letter to the preceding sentence, if it ends in a period. We also exclude all speeches listed as being from June 14,  
22 1894, as many of these were found to be modern speeches that have been mistakenly included among the speeches from that  
23 date. Most speeches in the dataset include a named speaker, state, and party, though about 15% of speeches are missing this  
24 information, most of which are procedural (e.g., “Without objection it is so ordered”).

25 For the speeches from the @unitedstates project (<https://github.com/unitedstates/congress>), we also tokenize them using spaCy,  
26 and then apply pre-processing to more closely match the format of the Gentzkow data. To do this, we replace all commas with  
27 periods, drop all apostrophes, and remove all hyphens connecting words.

28 For the Presidential data, we first split each document into paragraphs (by splitting on newlines), and treat each paragraph  
29 as a segment. Some documents (such as transcripts of press briefings) include comments from multiple speakers. To exclude  
30 speeches by everyone except The President, we filter out blocks of text that begin with “Q.” or “Q:” (question) as well as other  
31 named positions (e.g., “The Vice President:”) and those that begin with a name preceded by a non-Presidential title (e.g., “Dr.  
32 [NAME]:”). For additional details, please refer to online replication code.

33 Although the Congressional Record data is generally of high quality, there are some errors from Optical Character Recognition  
34 (OCR), especially in earlier years. Table S1 shows, for three key terms, the most common similar tokens found in the first part  
35 of this corpus (sessions 46-70) (those that have an edit distance of one to the target). The counts of obvious OCR errors are  
36 relatively small, but we nevertheless include some common variations (e.g., “innmigration”, “innigration”) as keywords when  
37 doing the initial speech selection for annotation.

**Table S1. Common OCR errors for three key terms. The table shows the token counts for the most common terms with an edit distance of one from the target terms (top row) in all speeches from the 46th to 70th Congress, revealing that OCR errors are present, but relatively rare.**

| Term         | Count | Term     | Count | Term     | Count |
|--------------|-------|----------|-------|----------|-------|
| immigration  | 25234 | chinese  | 17932 | mexican  | 14868 |
| inmigration  | 138   | chinee   | 41    | mexicans | 1533  |
| innmigration | 86    | chines   | 30    | merican  | 100   |
| imigration   | 48    | -chinese | 17    | exican   | 37    |
| immnigration | 43    | chineso  | 15    | mlexican | 28    |
| immnigration | 38    | chinese- | 13    | lexican  | 14    |
| inmmigration | 27    | hinese   | 12    | miexican | 12    |

## 38 Details of Annotations for Relevance and Tone

39 In order to get a sufficiently large number of positive examples for annotation, initial keyword filters were used to identify  
40 sentences in the Congressional speeches that were potentially about immigration. These were developed through an iterative  
41 process of keyword selection, query expansion, and exploration, and encompassed prefixes relating to immigration (e.g.,  
42 “immig”), regions and nationalities (e.g., “irish”), labor (e.g., “cooly”), naturalization (e.g., “visa”), and related terms, as well  
43 as some specific keywords and bigrams (e.g. “I.N.S.”, “foreign workers”, “ellis island”, etc.). Three separate but overlapping  
44 lists were used for three phases of immigration: early (1873-1934), mid (1935-1956), and modern (1957-2020). For the full list  
45 of terms, please refer to online replication code.

46 After identifying relevant sentences with keywords, segments consisting of the sentence, along with the preceding and  
47 following three sentences, were exported and aggregated into batches, which were randomly assigned to annotators, such that  
48 each segment was assigned to at least two annotators, and approximately equal numbers of sentences were annotated by  
49 all possible pairs of annotators. Annotators read the passages and rated them as relevant to immigration or not (yes/no), and  
50 for the relevant segments, provided a judgement as to the overall tone of the passage (pro-immigration, anti-immigration, or  
51 neutral). Annotators also provided open ended free-text responses about how immigrants were being characterized in each  
52 passage, if applicable. Critically, the same set of five annotators provided the annotations for all annotated segments, meaning  
53 that consistent notions of relevance and tone were applied to the whole corpus. The numbers of annotated examples are given  
54 in the Table S2 below.

55 Although it is difficult to summarize all position on immigration using a simple ternary categorization scheme, (for example,  
56 someone might favor increased immigration, but oppose immigration from particular countries), annotators were told to

**Table S2. Number of annotated segments for each time period and task. Note that most examples were annotated by at least two annotators. Annotations from the middle period were only used for evaluation. In addition, modern tone annotations were augmented with tone annotations from the Media Frame Corpus (2).**

| Label     | Early (1873-1934) | Mid (1935-1956) | Modern (1957-2020) |
|-----------|-------------------|-----------------|--------------------|
| Relevance | 3786              | 1440            | 2400               |
| Tone      | 1995              | 521             | 1127               |

57 treat the pro-immigration position as being favorable towards immigrants and continued or increased immigration, and  
 58 anti-immigration as being unfavorable towards immigrants or favoring greater restrictions on immigration. For the purpose  
 59 of relevance judgements, immigrants were considered to be any foreign born people residing temporarily or permanently in  
 60 the United States, excluding discussions of internal migration, American Indians or Indigenous peoples, African slavery, or  
 61 movement to or from U.S. territories and protectorates.

62 The chance-corrected agreement rates among the annotators for each task and subset of the data are give in table S3 below,  
 63 measured using Krippendorff's alpha (which produces values in the range  $[-1, 1]$ , with  $\alpha = 0$  indicating agreement at the level  
 64 of chance. As can be seen, agreement rates are very strong for relevance, and somewhat weaker for tone, revealing that it is  
 65 a more challenging task. In addition, agreement rates are broadly similar across the three time periods, indicating that the  
 66 annotators did not have substantially greater difficulty annotating the tone of segments from the early time period, despite  
 67 having less familiarity with the language and issues of the day.

**Table S3. Chance corrected agreement rates, measured using Krippendorff's alpha, for each of the three subsets of data and two tasks, showing strong agreement for relevance, and somewhat weaker agreement for tone (1 = perfect agreement; 0 = agreement at the level of pure chance).**

| Label     | Early (1873-1934) | Mid (1935-1956) | Modern (1957-2020) |
|-----------|-------------------|-----------------|--------------------|
| Relevance | 0.77              | 0.80            | 0.71               |
| Tone      | 0.43              | 0.49            | 0.51               |

68 To aggregate the multiple annotations per segment from the annotators, we make use of a Bayesian item-response style  
 69 model, which models latent item labels and latent annotator biases (see Appendix of (3)). This model simultaneously infers a  
 70 probability distribution over labels (e.g., yes/no, or pro/neutral/anti) for each item and biases for each annotator, allowing us  
 71 to determine the appropriate label in cases where annotators disagree. We first aggregated the relevance judgements to select  
 72 all annotated segments deemed relevant. For that subset, we similarly infer a distribution over tone labels (pro, neutral, or anti).  
 73 This was done separately for the three slices of annotations: early (1873-1934), mid (1935-1956), and modern (1957-2020).

74 The average tone by party using only the inferred labels from the annotated segments for the three time period is shown in  
 75 Figure S1 below, revealing that the same trends we observe in Figure 1 (in the main paper) are also reflected in the annotated  
 76 data (though with much less precision, due to the limited amount of data). As can be seen, we also annotated more data from  
 77 the earliest time period, to help account for possible unfamiliarity with the language and issues of the time.

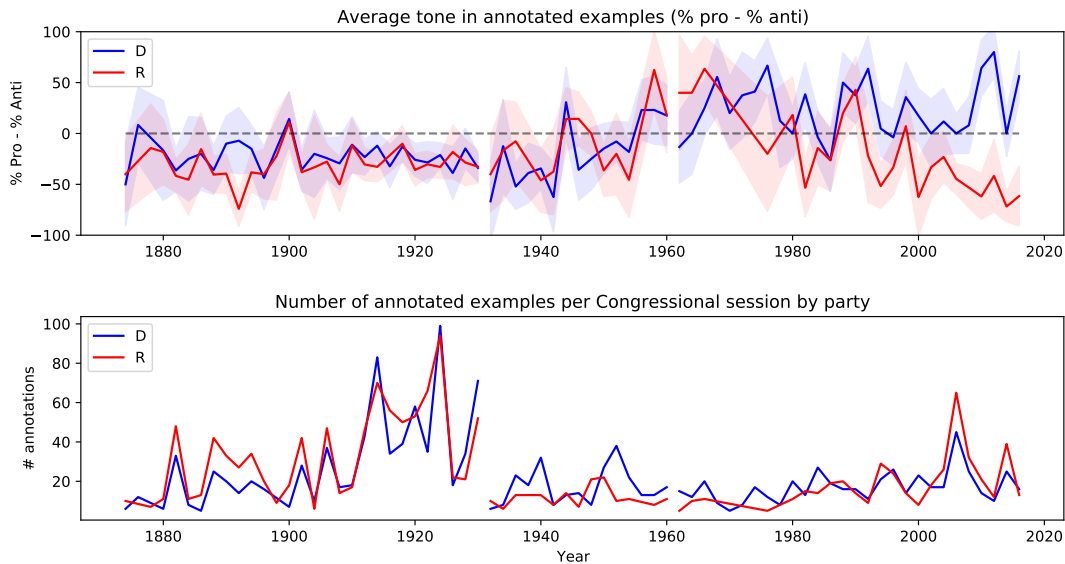

**Fig. S1.** Average tone (% pro - % anti) using only the annotated segments for three time periods (top), and the number of segments annotated per session of Congress (bottom), divided by party in both cases.

## 78 Details of Training and Applying Classifiers for Relevance and Tone

79 Using the inferred labels from the annotated segments, we then trained a pair of classifiers for both the early and modern time  
80 periods, which we chose to focus on due to the relatively small amount of immigration to the U.S. in the intervening years.  
81 For both time periods, we trained a binary classifier for relevance, and a ternary classifier for tone. To do so, we built on the  
82 `transformers` library, beginning with the pretrained `roberta-base` model provided by Hugging Face (<https://huggingface.co/>).  
83 We implemented a weighted classifier that incorporates the inferred label probabilities into the cross entropy loss as weights  
84 during training. For the tone classifier for the modern time period, we also augmented the annotations we collected with  
85 similar tone annotations from the immigration news articles in the Media Frames Corpus (2), which resulted in a slight increase  
86 in held out performance.

87 To identify relevant speeches in the full corpus, we first applied the relevance and tone classifiers to all segments which  
88 contained keywords (the pool of candidate segments for annotations). A second, smaller set of speeches was identified by  
89 identifying speeches not yet identified as being about immigration, breaking them into segments, classifying all of those segments  
90 as being relevant or not, and keeping only those speeches that contained segments classified as relevant and occurred on a day  
91 with many speeches already classified as being about immigration (see replication code for details). In this way, the relevant  
92 speeches primarily consisted of those that contained keywords, but were not limited to those.

93 The overall tone of each speech is obtained by counting the number of segments in a speech classified as being pro, neutral,  
94 or anti (among those classified as being relevant to immigration). In other words, although we count entire speeches which only  
95 briefly mention immigration as being *relevant* to the issue, the *tone* assigned to each speech is determined only by those parts  
96 of the speech which are judged relevant, not the unrelated parts.

97 For the early and later periods, we only use the predicted labels from the corresponding models. To get final labels for  
98 segments from the middle period, we used a linear interpolation of the predicted probabilities from the two models, placing all  
99 the weight on the early model in 1934 and transitioning to placing all the weight on the modern model by 1957.

100 To confirm that these models are comparable, we inspect the aggregate predictions made by each model individually on all  
101 of these years, as shown below. We also plot the predictions using both the Gentzkow et al data and the @unitedstates project  
102 data for the years where they overlap (the 104th to the 112th Congress) to confirm that the slight differences between these  
103 data sources are not consequential. As shown in Figures S2 and S3 below, there is nearly perfect overlap for the later models  
104 (for both relevance and tone) for the comparison between data sources, demonstrating that the minor differences between these  
105 sources are not consequential. By contrast, the difference between Model 1 and Model 2 is slightly larger. This makes sense  
106 however, given that the content of speeches about immigration changed dramatically over this time, hence the use of two  
107 different models. Nevertheless, the earliest aggregate predictions of the later model agree strongly with those of the earlier  
108 model, implying that the predictions from these two models are indeed comparable.

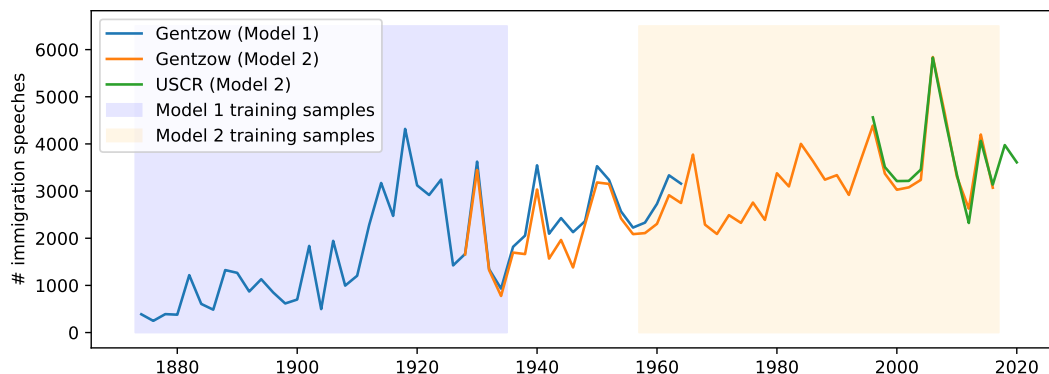

Fig. S2. Aggregate relevance predictions from the two relevance models, on both the full Gentzkow et al data and the @unitedstates project data (USCR). The blue and orange shaded areas show the data sampling periods for the first and second model, respectively. The blue and orange lines show the number of segments classified as being about immigration (per Congress) on the Gentzkow et al data by the first and second models, respectively. The green line shows the same for the predictions of the later model on the @unitedstates project data. As can be seen, there is strong agreement between these three lines, indicating that a) the two models are comparable to each other, and b) the two data sources are comparable to each other.

109 Overall performance estimates are provided in Tables S4 and S5 below, both as confusion matrices and overall accuracy. For  
110 the early and later time periods, we report numbers using cross-fold validation, averaging over multiple random seeds. For the  
111 middle period (which was not used for training), we simply report numbers from the final predictions of our classifiers on all  
112 annotated segments.

113 Accuracy on predicting relevance of immigration segments is consistently about 90% for all three time periods, including  
114 for the middle period, which was not used for training. The accuracy for identifying tone is lower, not surprisingly, as this is  
115 both a harder task, and there is less labeled data available (only the annotated segments labeled as relevant). Nevertheless,  
116 performance is again fairly consistent across time periods, achieving approximately 65% accuracy, including during the middle  
117 period. More importantly the rate of misclassifying pro-immigration segments as anti-immigration segments, and vice versa, is  
118 low, meaning that the errors will be of degree rather than kind.

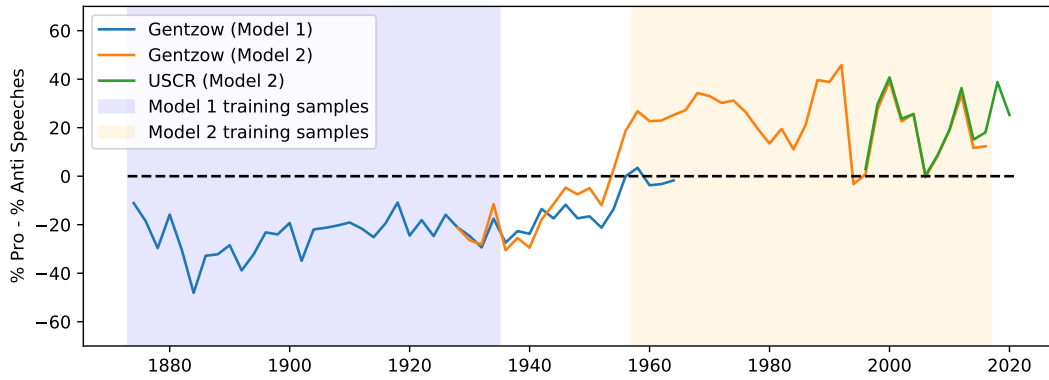

**Fig. S3.** Aggregate tone predictions from the two tone models, on both the full Gentzkow et al data and the @unitedstates project data (USCR). As above (Figure S2), there is near perfect agreement between the two data sources. The agreement between the two models in the middle period is slightly weaker than for relevance, but the aggregate predictions still show the same trends. In particular, the prediction of the later model match the earlier model almost perfectly at the beginning of the transition period. By contrast, the latest predictions of the earlier model are not as positive as those made by the later model, likely because there are aspects of positive immigration language in the 1960s that the earlier model was not exposed to in the data it was trained on.

119 In order to ensure that our results are not being excessively influenced by underlying biases in the base RoBERTa model, or  
 120 differential classifier performance, we include a series of validation checks, using alternative model specifications and aggregate  
 121 corrections (see Validity Checks for Tone below).

**Table S4. Estimates of performance for identifying speeches as being relevant to immigration, for early, middle, and modern time periods, shown as confusion matrices and overall accuracy.**

| True / Pred |          | No   | Yes  | Accuracy |
|-------------|----------|------|------|----------|
| Early       | No       | 0.60 | 0.06 | 0.91     |
|             | Yes      | 0.03 | 0.30 |          |
|             | Accuracy |      |      |          |
| True / Pred |          | No   | Yes  | Accuracy |
| Middle      | No       | 0.64 | 0.09 | 0.90     |
|             | Yes      | 0.01 | 0.26 |          |
|             | Accuracy |      |      |          |
| True / Pred |          | No   | Yes  | Accuracy |
| Modern      | No       | 0.47 | 0.07 | 0.88     |
|             | Yes      | 0.05 | 0.40 |          |
|             | Accuracy |      |      |          |

**Table S5. Estimates of performance for classifying the tone of immigration speeches, for early, middle, and modern time periods, shown as confusion matrices and overall accuracy.**

| True / Pred |          | Anti | Neutral | Pro  | Accuracy |
|-------------|----------|------|---------|------|----------|
| Early       | Anti     | 0.26 | 0.10    | 0.03 | 0.63     |
|             | Neutral  | 0.13 | 0.31    | 0.05 |          |
|             | Pro      | 0.03 | 0.03    | 0.06 |          |
|             | Accuracy |      |         |      |          |
| True / Pred |          | Anti | Neutral | Pro  | Accuracy |
| Mid         | Anti     | 0.23 | 0.08    | 0.02 | 0.69     |
|             | Neutral  | 0.08 | 0.31    | 0.04 |          |
|             | Pro      | 0.02 | 0.07    | 0.15 |          |
|             | Accuracy |      |         |      |          |
| True / Pred |          | Anti | Neutral | Pro  | Accuracy |
| Modern      | Anti     | 0.24 | 0.08    | 0.03 | 0.67     |
|             | Neutral  | 0.06 | 0.17    | 0.08 |          |
|             | Pro      | 0.02 | 0.06    | 0.26 |          |
|             | Accuracy |      |         |      |          |

## 122 Identifying Procedural Speeches

123 Many of the speaking turns in Congress are pro forma, such as “Without objection it is so ordered”. However, there is no strict  
124 definition of what counts as a “procedural speech”, and at times the pro forma language appears in slightly modified form,  
125 or occurs in combination with more substantive speech. Although most such speeches are unlikely to be classified as being  
126 relevant to immigration, we still endeavor to exclude procedural speeches, to avoid misleading estimates (especially for the  
127 overall prevalence of immigration speeches). To do so, we work on the assumption that short speeches which are repeated  
128 verbatim or nearly verbatim many times should be treated as procedural.

129 To identify and exclude such speeches, we first exclude all speeches shorter than three words or sixteen characters (e.g.,  
130 “nay”). We then train a regularized logistic regression classifier, representing text as the binarized counts of unigrams, bigrams,  
131 and trigrams (e.g. “is so ordered”). To obtain training data for such a classifier, we first identify short speeches that are  
132 repeated verbatim many times. We first simplify each speech by dropping punctuation, converting to lowercase, and converting  
133 all gaps between tokens to single spaces. We then identify speeches shorter than 200 characters, and keep those that are  
134 repeated verbatim at least 20 times as positive examples of procedural speeches, and put a random 10% of these into the  
135 training data. (We only use 10%—giving each unique text string an equal chance of being selected, no matter how many times  
136 it occurs—due to the massive number of such speeches). As negative examples, we take all speeches with more than 1000  
137 characters (and more than twenty tokens), and break them into pieces of approximately 200 characters. We select a random  
138 5% of these as non-procedural test instances, and add the rest to the training data. To create procedural examples for the test  
139 set, we count all speeches that occur verbatim at least ten but less than twenty times, and add each such unique speech as a  
140 procedural example to the test set.

141 Using this training data, we then train an L1-regularized logistic regression model, keeping all ngrams (for n equals 1, 2, or  
142 3) that occur at least twice, choosing the regularization strength using 5-fold cross validation. The resulting model obtains over  
143 99% accuracy and over 99% F1 on the held-out test set described above. We then apply this classifier to all speeches shorter  
144 than 400 characters, and exclude all speeches classified as procedural (approximately 8 million speeches, or 45% of the speeches  
145 in the full corpus).

## 146 Frequency of Immigration Speeches

147 Figure S4 shows how common the topic of immigration is over time, both in Congress (top), and in Presidential communications  
148 (bottom). The two trajectories are broadly similar, with immigration being mentioned much more under Presidents George W.  
149 Bush, Barack Obama, and Donald Trump, compared to previous Presidencies. The frequency with which it is discussed is very  
150 similar between the two parties, though Republicans spoke much more about it under President Bush, and Democrats spoke  
151 much more about it under President Trump. President Trump himself mentioned immigration far more frequently than any  
152 previous President, especially in 2017 and 2018. Overall, immigration is an even more salient issue today than it was during  
153 the debate around immigration quotas in the 1920s.

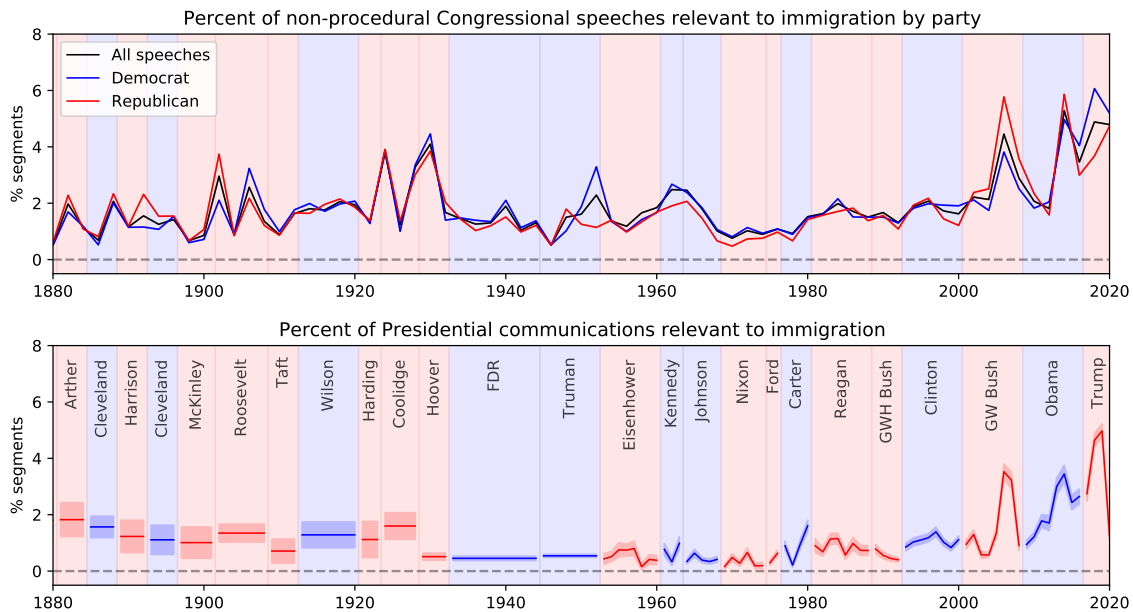

**Fig. S4.** Frequency of immigration speeches: in Congress (top), and by Presidents (bottom). The Presidential plots shows the percent of paragraphs classified as being about immigration (because the raw data is conveniently broken into paragraphs), whereas the Congressional plots show this as the approximate percentage of speech segments about immigration, which is estimated by dividing the total number of tokens in speech segments classified as being about immigration by the total number of tokens in each session of Congress, both overall and separately by party.

154 **Validity Checks for Tone**

155 **Linear Models.** Classifiers based on pre-trained models, such as RoBERTa, typically perform better, but introduce some amount  
156 of unknown bias (from the pre-training data). To verify that our results are not being excessively influenced by **roberta-base**,  
157 we repeat our pipeline using basic logistic regression models, operating on bag-of-words features (which avoids all issues with  
158 biases from pretraining data) and reproduce Figure 1 in the main paper based on the predictions from these simpler classifiers.

159 For the sake of simplicity, and to simultaneously address concerns about our use of separate models for the earlier and  
160 later parts of our data, we do this replication using only a single model for relevance, and a single model for tone. That is, we  
161 combine all annotated data, leaving out a random set of 400 segments for each, and train one logistic regression model on  
162 the combined relevance annotations, and another on the combined tone annotations. Because data is limited, we do not do  
163 extensive tuning of these models. Rather, we use what are known to be strong default choices (4): we use all unigrams and  
164 bigrams that occur at least twice in the training data, binarize all features (present or absent), and regularize the model using  
165 L1-regularization, with strength tuned using five-fold cross validation. The resulting models have similar accuracy for relevance  
166 (0.89), but slightly lower accuracy for tone (0.63). Nevertheless, the resulting time series for Congressional Speeches using  
167 the logistic regression models, shown in Figure S5, is overall extremely similar to the one based on the contextual embedding  
168 models (Figure 1 in main paper). The differences for the Presidential time series are somewhat more pronounced, though we  
169 still find that modern presidents are generally more positive than those in the past, with President Trump again being a stark  
170 outlier.

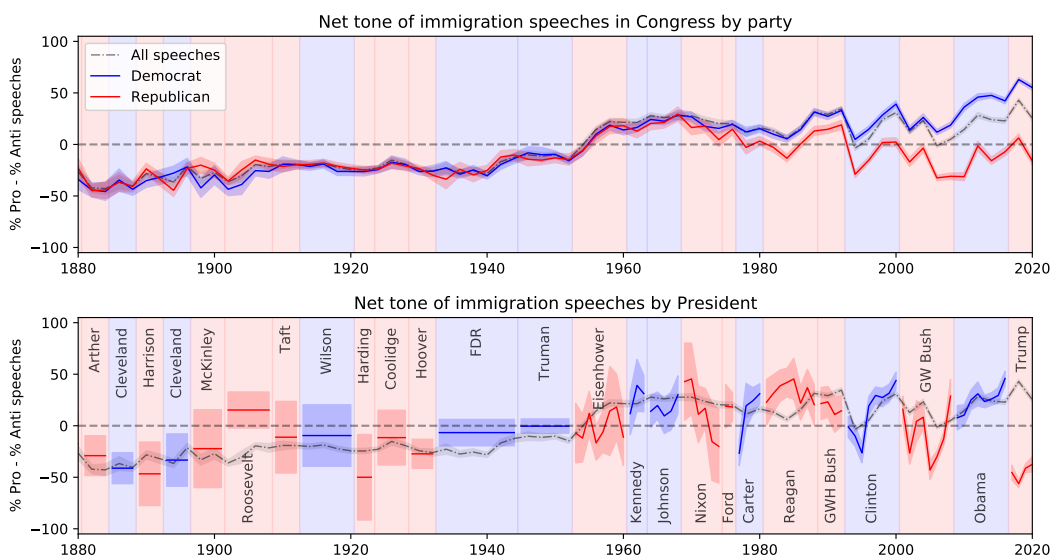

**Fig. S5.** Replication of Figure 1 in the main paper (average tone over time for Congress and Presidents in the top and bottom sub-panels, respectively), using logistic regression models for relevance and tone (based on unigram and bigram features), rather than models based on **roberta-base**. As can be seen, results are extremely similar to the main results in terms of all important findings.

171 We similarly use these models to recreate Figure 2 in the main paper, shown in Figure S6, again finding no meaningful  
172 difference from the models based on **roberta-base**, which helps to assuage concerns that biases present in the RoBERTa models  
173 could be distorting our results. (Note that for Figure S6, because we only plot sessions with at least 20 relevant speeches, there  
174 are some differences in terms of which sessions are plotted, due to slight differences in which speeches are classified as relevant).

175 **Binary Tone.** In order to address concerns about the fluctuating prominence of the “neutral” category, as well as the difficulty  
176 in interpreting our main measure of tone (% pro - % anti), we train a separate tone model, again based on **roberta-base**, but  
177 using only the annotated segments that were labeled as pro- or anti-immigration (excluding neutral). For simplicity, we train a  
178 single binary tone model for the entire time series, and then use it to classify the entire corpus, for both Congressional and  
179 Presidential speeches.

180 The results from this model are shown in Figure S7, plotted as the percentage of speeches over time (per party) classified as  
181 pro-immigration. Although there are some subtle differences from the figure in the main paper (specifically a greater degree of  
182 negativity in the past relative to the present), overall the patterns are remarkably similar. We generally consider this figure to  
183 be less meaningful than the results in the main paper, since it represents a mismatch between the predictions and the original  
184 annotation scheme, but the similarity of results again helps to bolster confidence in our findings.

185 **Correcting for Tone Error Rates.** To address concerns about the accuracy of our tone classifiers, and the possibility that  
186 systematic errors could be distorting our results, we make use of a correction based on Bayesian inference, which accounts for  
187 effects of both time period and party. To do so, we first estimate the prior probability of each tone label (pro, neutral, or anti)  
188 for each party in each Congressional session. This is done by averaging the labels provided by annotators for all segments

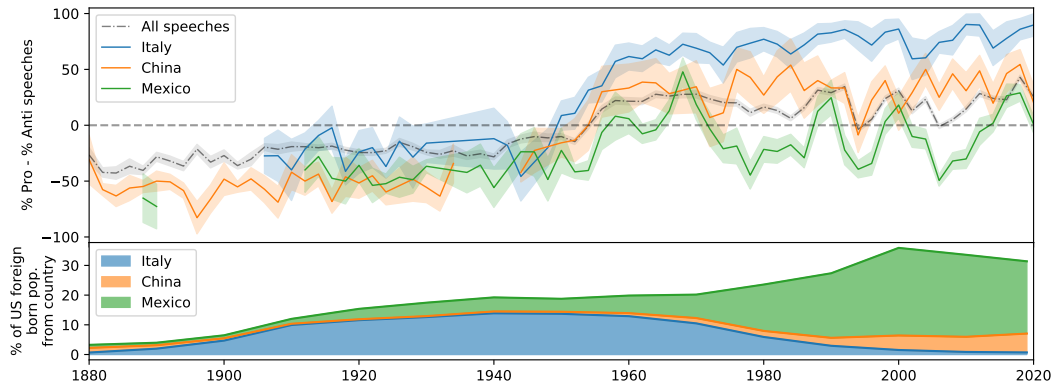

**Fig. S6.** Replication of Figure 2 in the main paper (average tone over time for the most frequently mentioned nationalities), using logistic regression models for relevance and tone (based on unigram and bigram features), rather than models based on roberta-base.

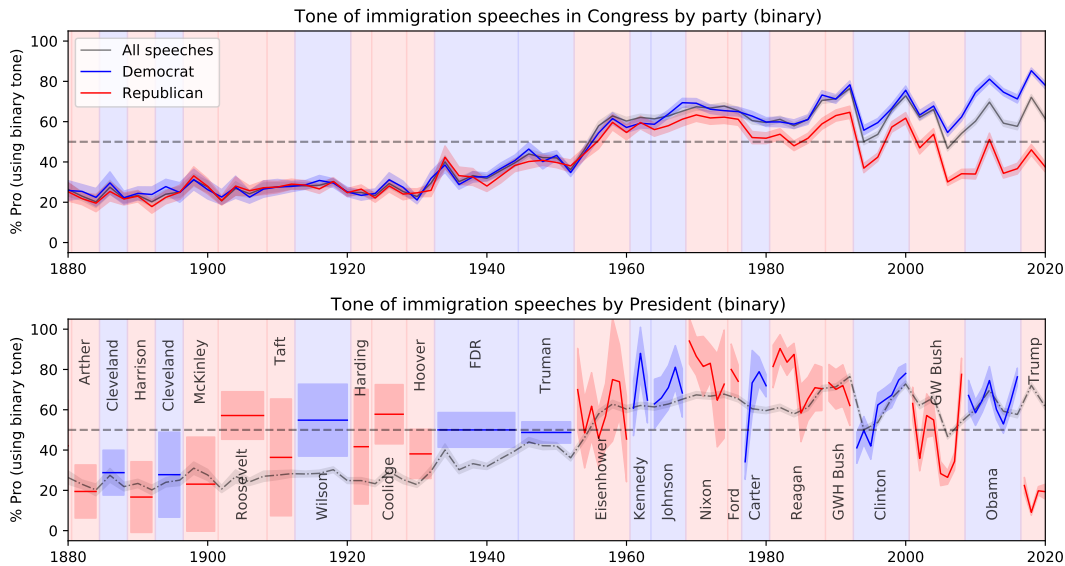

**Fig. S7.** Alternative to Figure 1 in the main paper using a different RoBERTa model, trained only on pro- and anti-immigration speeches, to predict tone as a binary variable. The y-axis shows the percentage of speeches per Congress classified as pro-immigration.

189 from within the previous or following 10 sessions of Congress, and gives us a prior label distribution per session and party,  
 190 based only on the raw annotated data, i.e.,  $p(y | P, C)$ , where  $y$  is the true (human-identified) tone of a speech,  $P$  is the party  
 191 (Republican or Democrat), and  $C$  is the session of Congress (43–116).

We then use the predictions of our tone models to estimate confusion matrices for tone predictions, similar to what is shown in Table S5, but normalized by row, and computed per-party for the modern model.\* This gives us an estimate of the probability of each predicted label, conditional on each true label, with estimates that vary depending on whether the Congressional session is from the early, mid, or modern period of annotations.† We denote these values as  $p(\hat{y} | y, P, C)$ , where  $\hat{y}$  is the predicted label, and  $y$  is the true label (provided by the annotators). Because what we actually want is the probability of a true label, conditional on a predicted label (provided by the models), we invert the confusion matrix using Bayes' rule, i.e.,

$$p(y | \hat{y}, P, C) \propto p(\hat{y} | y, P, C) \cdot p(y | P, C),$$

192 and normalize by summing over all values for each predicted label.

193 Putting this all together, we use the inverted confusion matrix to correct the predicted tone probabilities for each segment  
 194 (which generally softens them away from high probability assigned to a single label), and recreate Figure 1 from the main  
 195 paper using the corrected probabilities, rather than the predicted labels (i.e., the sum of the pro-immigration probabilities  
 196 minus the sum of the anti-immigration probabilities). The resulting Figure is shown in Figure S8.

197 Although there are some minor changes from the original time series, the overall patterns are essentially the same. Regardless,  
 198 we treat this a supporting validity check, rather than our main result, in part due to potential error in estimating error rates

\* For the early model, we just use a single estimate, since there is so little difference between the parties.

† The confusion matrices are not estimated per session of Congress because they require more data than the class priors.



199 and class priors from limited amounts of annotated data.

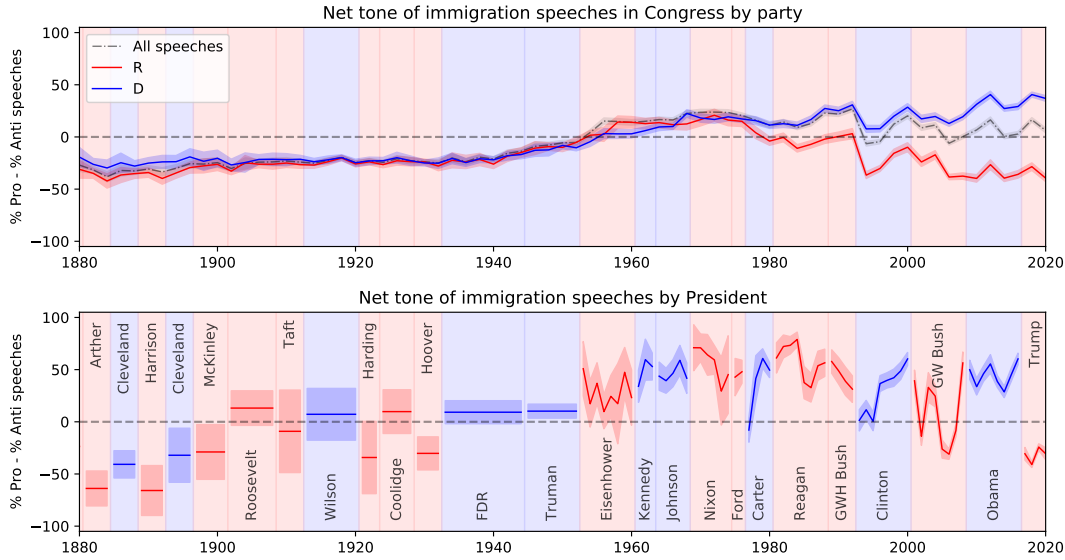

Fig. S8. Alternative to Figure 1 in the main paper, after applying a Bayesian correction to the predicted probabilities, to account for error rates in models and prior label distributions from annotation (by party and over time).

200 **Leave-one-out Analysis.** Finally, to ensure that the results are not being strongly influenced by individual members of Congress,  
 201 we recompute the tone time series from Figure 1 in the main paper, leaving out each speaker in turn (for those with at least 20  
 202 immigration speeches). We plot each resulting time series in the bottom half of Figure S9, which shows that nearly all of the  
 203 resulting time series are virtually identical, indicating that results are not driven by a single influential speaker.

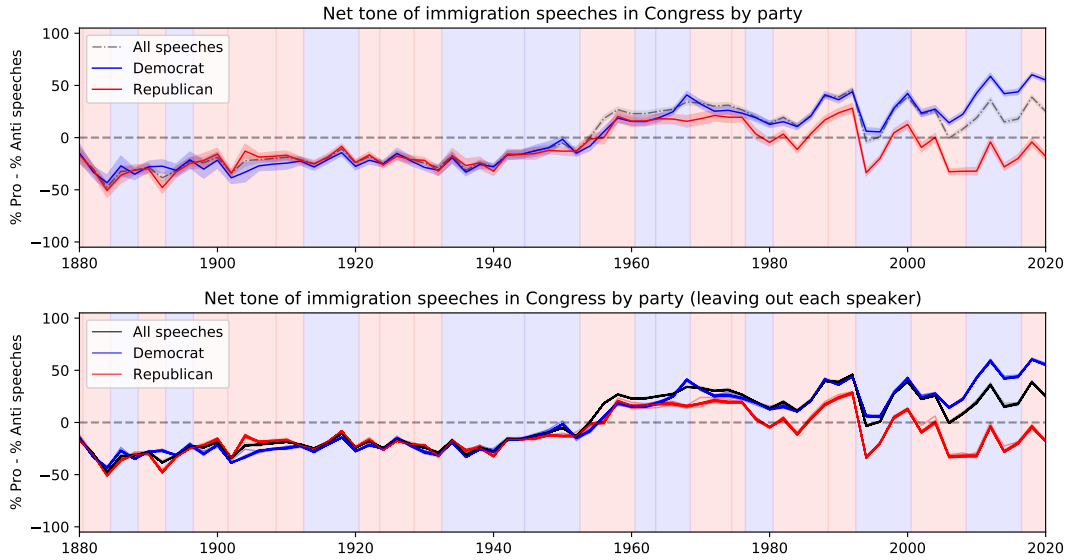

Fig. S9. The original time series from Figure 1 in the main paper (top), and the equivalent results (without bands), when leaving out each speaker in turn, demonstrating that the changes in tone are not being driven by individual members of Congress. Occasional deviations can be seen (e.g., in 2003–2004 among Republicans, where one speaker did have a relatively large negative impact), but mostly the resulting lines are nearly identical.

204 As a complement to this, Figure S10 shows the pattern in net tone per speaker, for all speakers in sessions of Congress where  
 205 they have at least 20 immigration speeches. As can be seen, there is considerable variability in tone within each party at all  
 206 points in time. In addition, we can see the most recent sessions of Congress are unprecedented, in that, except for one or two  
 207 outliers, the most anti-immigration Democrat is still more pro-immigration than the most pro-immigration Republican. During  
 208 the Trump administration, we find that all Democrats (among those for whom we have sufficient data), were pro-immigration  
 209 in their speech, on average, whereas nearly all Republicans were anti-immigration, according to our metric, as was the case for  
 210 nearly all legislators before the 1950s.

211 The largest outlier with respect to this finding is the one Republican who appears very pro-immigration in 2017–2018. This  
 212 point represents Ileana Ros-Lehtinen (R, FL), who was the first Cuban-American elected to Congress, and co-founder of the  
 213 Bipartisan Congressional Refugee Caucus (5). Although we should not place too much weight on any individual point (due to  
 214 the limited number of speeches per session of Congress), a pro-immigration estimate for Representative Ros-Lehtinen is not  
 215 implausible.

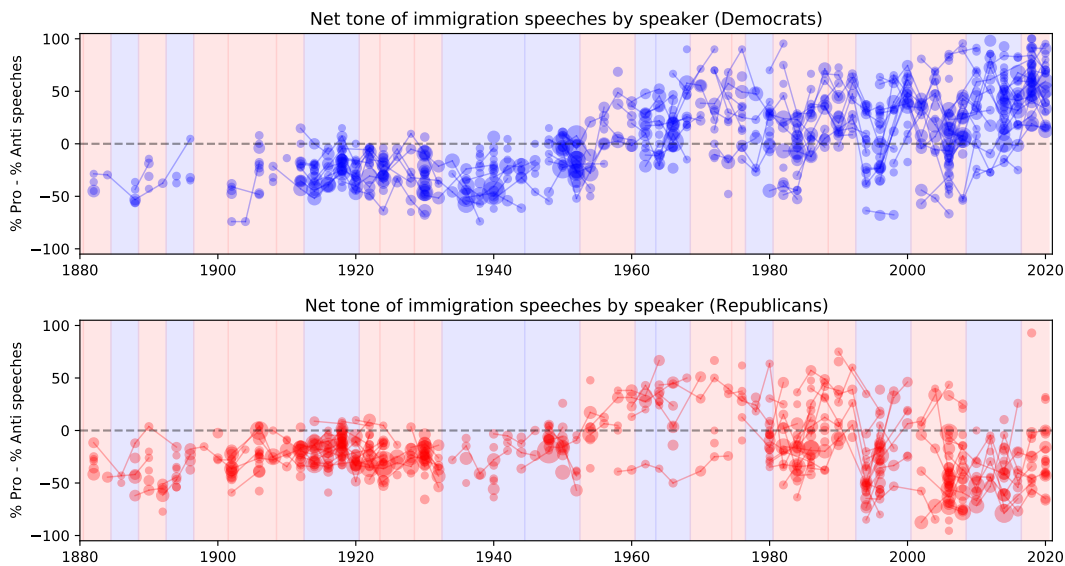

Fig. S10. Tone of immigration speeches by speaker. Each dot shows the net tone of immigration speeches by a speaker for a single session of Congress in which they have at least 20 such speeches, with size indicating the number, and lines connecting the dots for each speaker.

216 For the most reliable estimates per speaker, Figure S11 shows individual tone estimates (% pro - % anti) for the twenty  
 217 members of Congress with the most speeches related to immigration. Nearly all of these prolific legislators appear to be  
 218 close to the overall Congressional average, and in some cases appear to change their expressed attitudes over time, largely in  
 219 line with evolving trends. The two most dramatic outliers relative to the average appear to be Jeff Sessions—who made an  
 220 anti-immigration position a key part of his political agenda (6)—and Alan Simpson—co-architect of the 1986 Immigration  
 221 Reform and Control Act, which targeted employers who hired people without authorization to work in the U.S.

222 Finally, figure S12 shows the percent of immigration speeches classified as pro, neutral, and anti over time, both overall  
 223 (top), and by party (Democrats middle and Republicans bottom). As can be seen, most speeches are neutral over most of this  
 224 time series, though these become less common over time, consistent with greater polarization. By contrast, there is a decline in  
 225 negative speeches and a rise in positive speeches in the middle of the century, followed by a resurgence in anti-immigration  
 226 sentiment.

## 227 Party, Region, and Chamber Model

228 Given the uneven geographical nature of immigration to the U.S., as well as regional realignments in party affiliation during  
 229 this time period, we provide a validity check on party polarization in which we disambiguate the contributions of party and  
 230 geography to changes in expressed attitudes towards immigration.<sup>‡</sup> To do so, we fit hierarchical Bayesian models to the  
 231 predicted tone of immigration segments, building linear models with effects per year for each of party and region, as well as  
 232 overall tone, with each type of offset drawn from its own hierarchical prior, which we fit using Stan (7).

233 In more detail, we model the tone of each speech as drawn from a normal distribution, with a mean parameter modeled  
 234 as a linear function of a overall mean tone per Congress, a party offset per Congress (Democrat, Republican, or no party  
 235 information), a region offset per Congress (North, South, or West), and an offset per Congress for the Senate. Each set of  
 236 values are drawn from a corresponding normal prior with individual variance parameter (for party, region, and chamber), with  
 237 weakly informative priors on the variance parameters (For additional details please refer to replication code).

238 Figure S13 shows our resulting estimate of the tone expressed towards immigration by party (top), with tone scaled between  
 239 -1 and 1, as well as the estimated difference in party biases (bottom), with bands showing plus or minus 2 standard deviations  
 240 based on samples from the posterior distribution. As can be seen, after accounting for regional effects, the overall expressed  
 241 tone towards immigration appears to have been at its most negative extreme during the Congressional session which included  
 242 1882 (the year of the Chinese Exclusion Act, renewed in 1902), and remained consistently negative up until World War  
 243 II. Expressions of pro-immigration tone then increased dramatically from approximately 1940 to the late 1960s, even when  
 244 accounting for differences between parties, regions, and chambers.

<sup>‡</sup>For example, Chinese immigration to the U.S. during the 19th century was largely concentrated in the West Coast, whereas Cuban refugees have historically had strong connections to Florida; in addition, geographic divisions within the Democratic party over segregation eventually led to a party realignment, with Republicans capturing much of the South over the course of the 20th century.

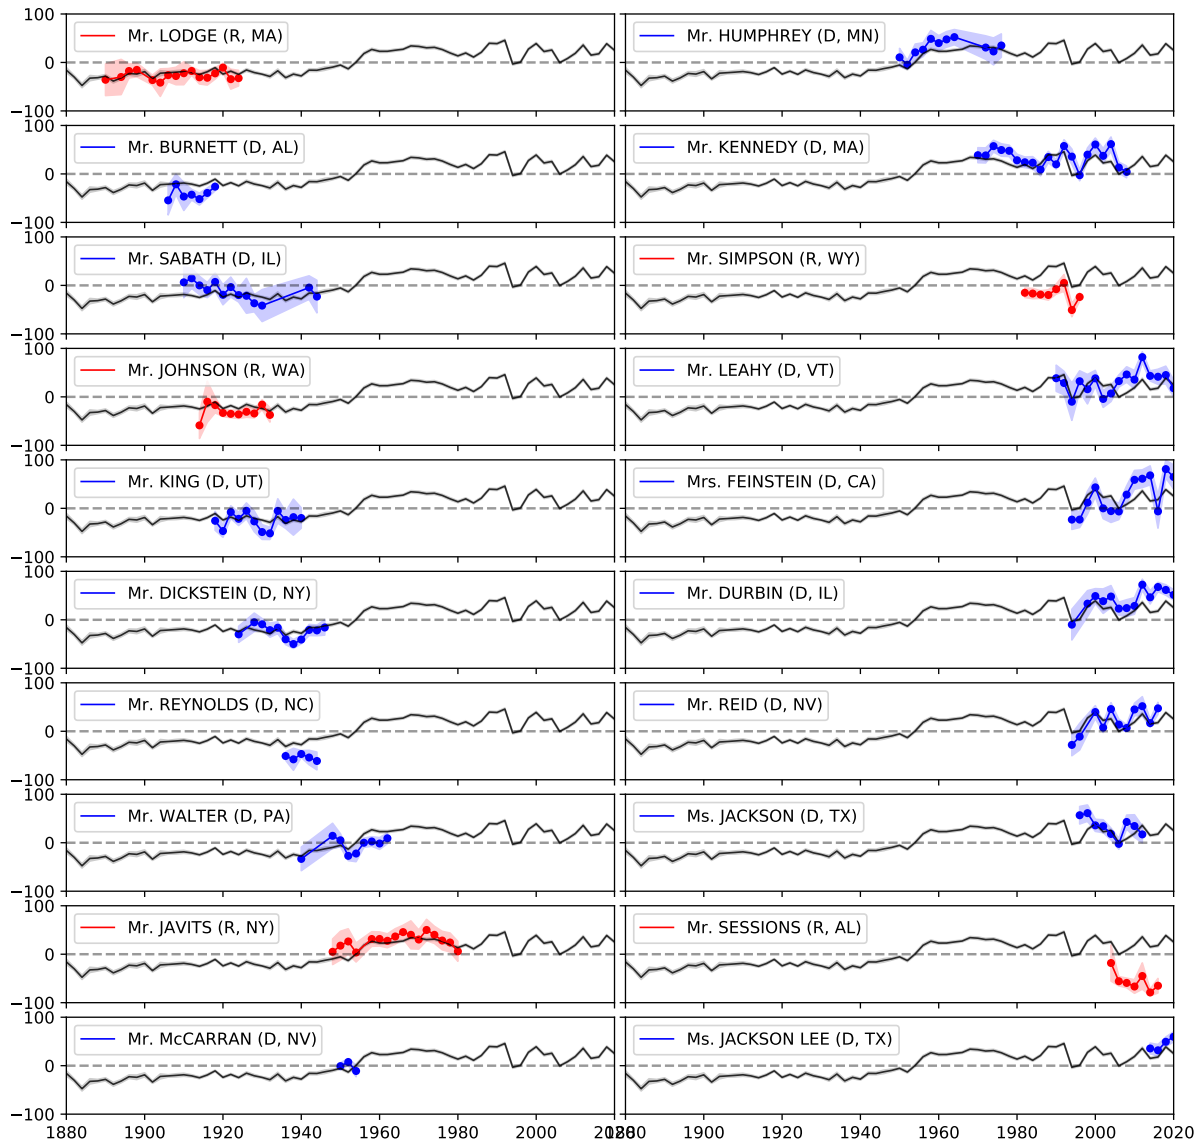

**Fig. S11.** The estimated attitudes towards immigration (% pro - % anti) of the 20 most prolific members of Congress (in terms of number of speeches) on the topic of immigration, overlaid on the overall trend. As can be seen, most of these mirror the overall trends, and generally remain close to the average attitude in Congress as it develops, with Jeff Sessions and Alan Simpson being the most extreme exceptions.

245 The attitudes expressed by both parties were pro-immigration on average during the entire 1960s and most of the 1970s,  
 246 but only the Democrats have maintained a pro-immigration position until the present day. According to the output of this  
 247 model, a significant difference first appeared between the parties during the 90th Congress (1967/68).<sup>§</sup> The parties then briefly  
 248 came back into alignment under Nixon, after which the difference in party bias has grown steadily from the late 1970s until the  
 249 present day, with the Republicans growing increasingly negative towards immigration, relative to the Democrats.

250 In terms of geography, meanwhile, the estimated biases by region (North, South, and West), are shown in Figure S14. We  
 251 see that the North has had a consistent mildly pro-immigration bias over this time period, while the South had a relatively  
 252 anti-immigration bias over the entire twentieth century, and the West has gradually changed from having an anti- to a  
 253 pro-immigration bias, with a considerable dip from the late 1970s to the early 2000s, especially during the period of discussion  
 254 of Prop 187 in California. Overall these regional biases pale in comparison, however, to the growing partisan divide shown  
 255 in Figure S13 (note the difference in scale between the two figures). Finally, Figure S15 shows the estimated offset for the  
 256 Senate over time, which fluctuates between slightly more pro- and anti-immigration than the House of Representatives, with no  
 257 consistent difference between them.

258 The drop in tone coinciding with the start of Bill Clinton's Presidency, which appears for both parties and for Clinton

<sup>§</sup>The largest contributors to the surge in pro-immigration sentiment among Democrats at this time were Senator Ralph Yarborough of Texas, a member of the progressive wing of the Democratic party who spoke extensively on behalf of Mexican Americans, and Representative Leo Ryan of California, who spoke positively about Irish and Italian immigrants, arguing in favor of citizenship for veterans.

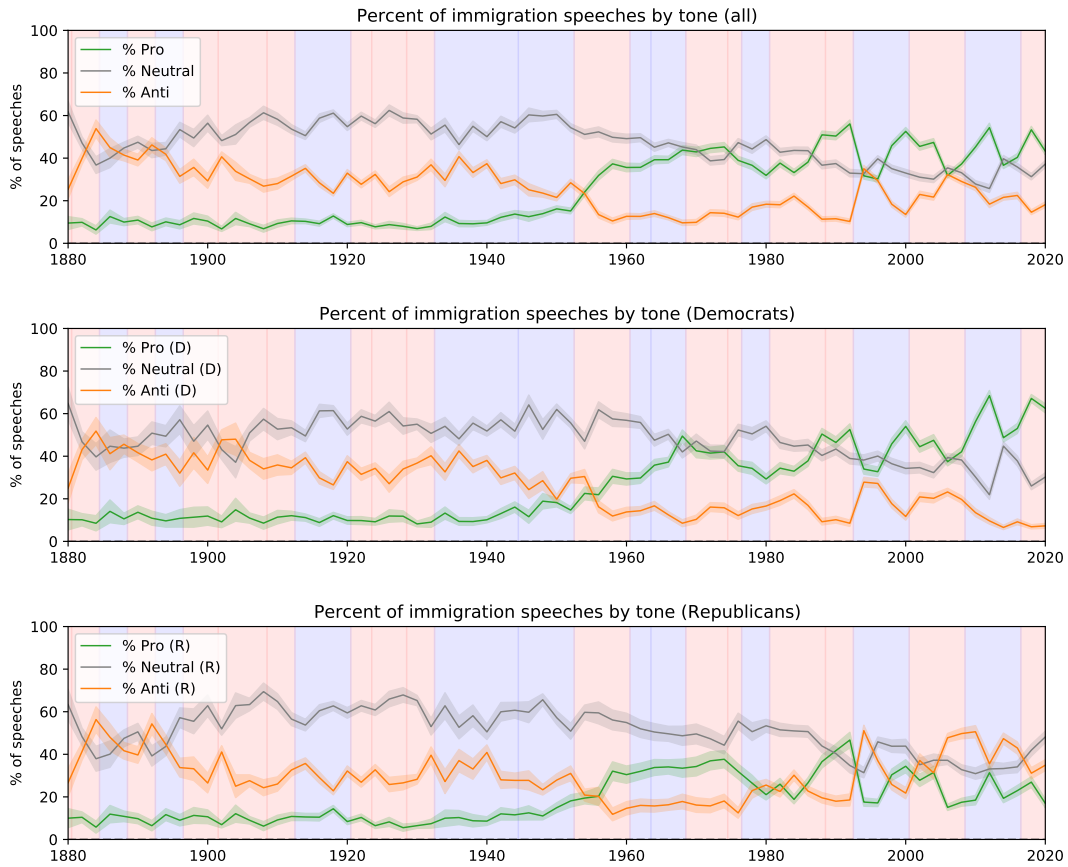

**Fig. S12.** Estimated percent of speeches related to immigration per year classified as being pro-immigration, neutral, or anti-immigration, plotted as a percentage of all immigration speeches (top), for speeches by Democrats only (middle), or for speeches by Republicans only (bottom).

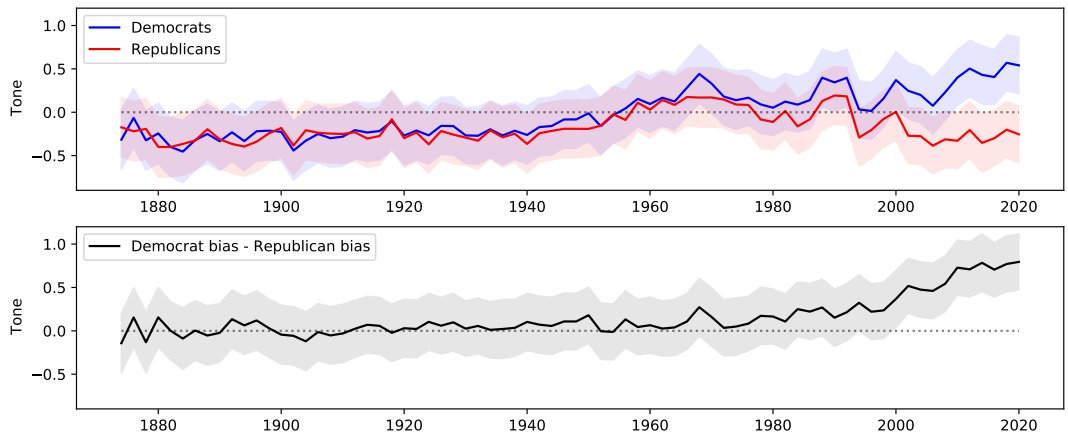

**Fig. S13.** Estimated tone by party over time (top), and estimated difference in party biases (bottom), after accounting for the effect of geography and chamber, with tone scaled between -1 and 1, and bands showing +/- 2 standard deviations using samples from the posterior distribution.

259 himself, seems to be a result of the end of the cold war, which meant a decline in sympathetic language in reference to victims  
 260 and refugees from the Soviet Union, combined with a rise in anti-immigration rhetoric regarding the U.S.-Mexico border. In  
 261 comparison to the preceding three sessions of Congress, the relatively most frequent terms in the 90th Congress (ignoring  
 262 person names, dates, and stopwords) are “NAFTA”, “Haiti”, “crime”, “illegal”, “Mexico”, and “border”. By contrast, the most  
 263 relatively infrequent terms are “Soviet”, “Israel”, “Jews”, “emigration”, “refugee”, and “freedom”.

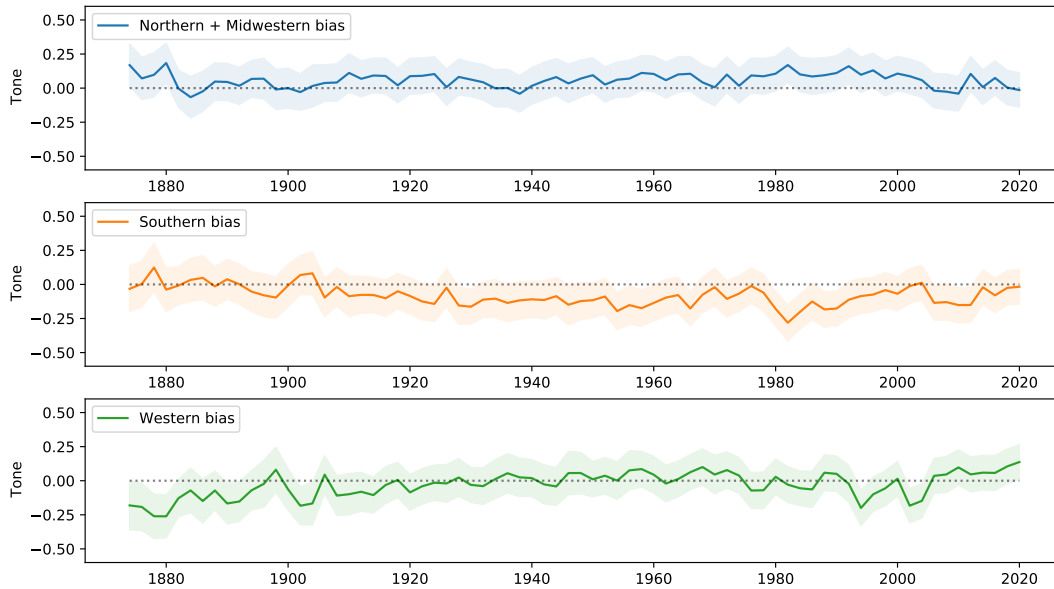

**Fig. S14.** Estimated regional offsets over time for the North, South, and West, respectively. Northern states are ME, MA, RI, CT, NH, VT, NY, PA, NJ, DE, OH, IN, MI, IL, MO, WI, MN, IA, KS, NE, SD, ND. Southern states are WV, VI, VA, KY, TN, NC, SC, GA, AL, MS, AR, LA, FL, TX, OK, NM, AZ. Western states are CO, WY, MT, ID, WA, OR, UT, NV, CA, AK, HI.

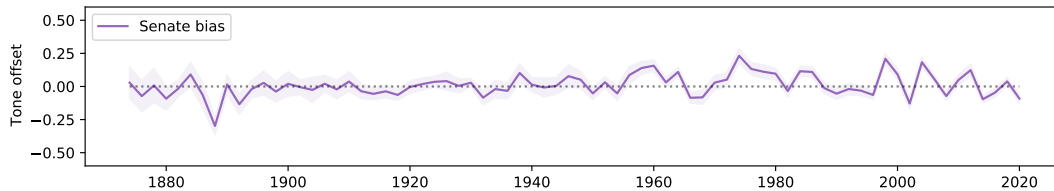

**Fig. S15.** Estimated Senate offset over time.

264 **Comparison to DW-NOMINATE**

265 The analyses of tone in the main paper primarily emphasize trends over time, and overall differences *between* the parties. It is  
 266 also interesting, however, to investigate whether our measure of tone captures variation *within* parties.

267 To do so, we obtained ideological positions for each speaker in Congress using DW-NOMINATE, a widely-used scaling  
 268 procedure to compare politicians based on their voting records (8). For each member of Congress from 1880–2020, we collected  
 269 information for the first and second dimension recovered by DW-NOMINATE using Voteview data from March 2022.<sup>¶</sup> The  
 270 first dimension captures the liberal-conservative spectrum, while the second has historically captured more differences within  
 271 political parties over regions, civil rights, and lifestyle (9).

272 We then matched the names from the Voteview database (which are official full names) with the name of the speakers in  
 273 our immigration speeches dataset. To deal with partial matches (due to partial names and OCR errors), we used the following  
 274 procedure: first, we normalized all names in both the Voteview and immigration speech records to be all uppercase and  
 275 converted accents and other diacritics to their ASCII representations. From our list of speakers, we then removed honorifics as  
 276 well as mentions of their district or state within the speaker field (e.g. converting “Ms. Warren of Massachusetts” to “Warren”).  
 277 Finally, we extract the last token from each politician in both datasets as the surname. Because many politicians have the same  
 278 surname, we confine our matching of names to DW-NOMINATE scores within states and congressional sessions (e.g. restricting  
 279 our search Massachusetts politicians in the 115th Congress enables us to correctly match Elizabeth Warren’s speeches to her  
 280 DW-NOMINATE score instead of Lindsay C. Warren, a North Carolina representative in the 69–76th Congresses.) Finally, to  
 281 handle misspellings, we use the Python `fuzzywuzzy` package to match misspelled names.<sup>‡</sup> All in all, we were able to match  
 282 speakers for 85% of speeches in our dataset to DW-NOMINATE scores.

283 Among those matched speakers with at least 10 speeches relevant to immigration, we calculated their average tone, i.e.,  
 284 their percentage of pro-immigration speeches minus percentage of anti-immigration speeches. We stratified the speakers by  
 285 party (Democrat and Republican) and time period (pre-1924, 1924–1965, and post-1965), so that we could analyze how the  
 286 correlation between our tone measure and DW-NOMINATE varied across parties and over time.

<sup>¶</sup> <https://voteview.com/data>

<sup>‡</sup> <https://pypi.org/project/fuzzywuzzy/>

287 Our results show that the first dimension of DW-NOMINATE, which captures the liberal–conservative spectrum, has  
 288 a negative relationship with our tone measure. That is, more conservative speakers within each party tend to be more  
 289 anti-immigration. For example, in the post-1965 era, when the relationship is strongest, regressing immigration tone on  
 290 DW-NOMINATE dimension 1 yields a regression coefficient of  $-0.68$  (s.e. = 0.08) for Democrats and  $-0.90$  (s.e. = 0.06) for  
 291 Republicans.\*\* The relationship is weaker but still negative from 1924–1965, and weakly positive before 1924, when immigration  
 292 was not yet a polarizing issue.

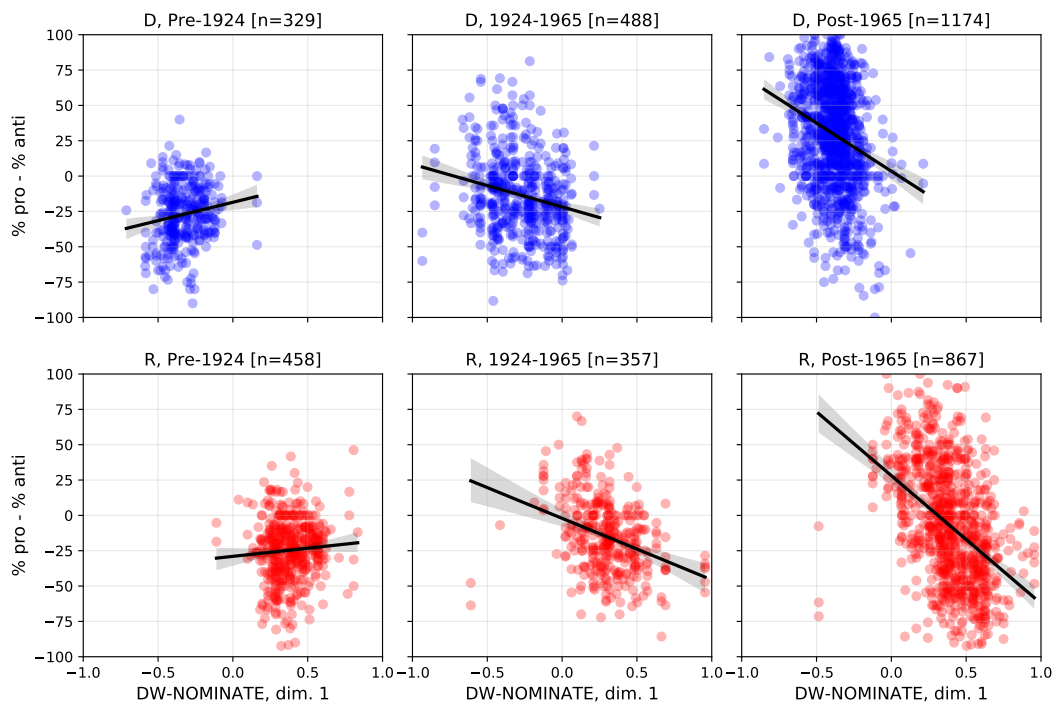

**Fig. S16.** Association between the mean tone of legislators with at least 10 speeches related to immigration (% pro - % anti) and the first dimension of DW-NOMINATE scores, in three time periods.

293 We also find that the second dimension of DW-NOMINATE has a negative relationship with our tone measure. The  
 294 interpretation of the second dimension is more ambiguous; it tends to capture cross-cutting issues that are not already captured  
 295 by the liberal–conservative spectrum. Like the first dimension, we find that the relationship becomes increasingly negative over  
 296 time and it is stronger for the Republican party. For example, in the final post-1965 era, the regression coefficients are  $-0.25$   
 297 (s.e. = 0.03) and  $-0.39$  (s.e. = 0.04) for Democrats and Republicans, respectively.

298 These results demonstrate that our tone measure is not only correlated with political ideology, but also that it can capture  
 299 variation across individuals within each party. Furthermore, this correlation becomes stronger over time, supporting the  
 300 argument that immigration has become an increasingly polarized issue.

### 301 Association between Tone and Public Opinion

302 An important question regarding Congressional speech on immigration is to what extent positions are driven by coordinated  
 303 messaging from party leadership (top-down), as opposed to individual reactions to voter opinions (bottom-up). Although we  
 304 cannot fully resolve this question here, we briefly investigate the relationship between tone and public opinion over time and  
 305 across states using data from Gallup.

306 **Public opinion data.** To capture public opinion, we used Gallup surveys, which we accessed from the Roper iPoll database. In  
 307 order to get a standard metric with reliable data over the longest possible timespan, we focused on the question, “In your view,  
 308 should immigration be kept at its present level, increased or decreased?” Since we wanted to compute immigration attitudes  
 309 per state, we focused on Gallup surveys for which we had microdata; that is, individual-level responses, where we knew each  
 310 individual’s response on the immigration question as well as other relevant demographics such as their home state and party  
 311 affiliation. We found 12 surveys from 2000–2014 for which we had this data.

312 We found—as in Congressional speeches—that attitudes towards immigrants improved over time among Democrats but  
 313 not among Republicans. We also found in general that more respondents wanted to keep immigration at its present levels or

\*\* Typically our tone measure, as a difference of percentages, falls between  $-100$  and  $100$ , while DW-NOMINATE falls between  $-1$  and  $1$  (as shown in Figures S16 and S17). However, here we rescaled our tone measure to the range of  $-1$  to  $1$  when reporting regression coefficients, so that two measures could be on the same scale.

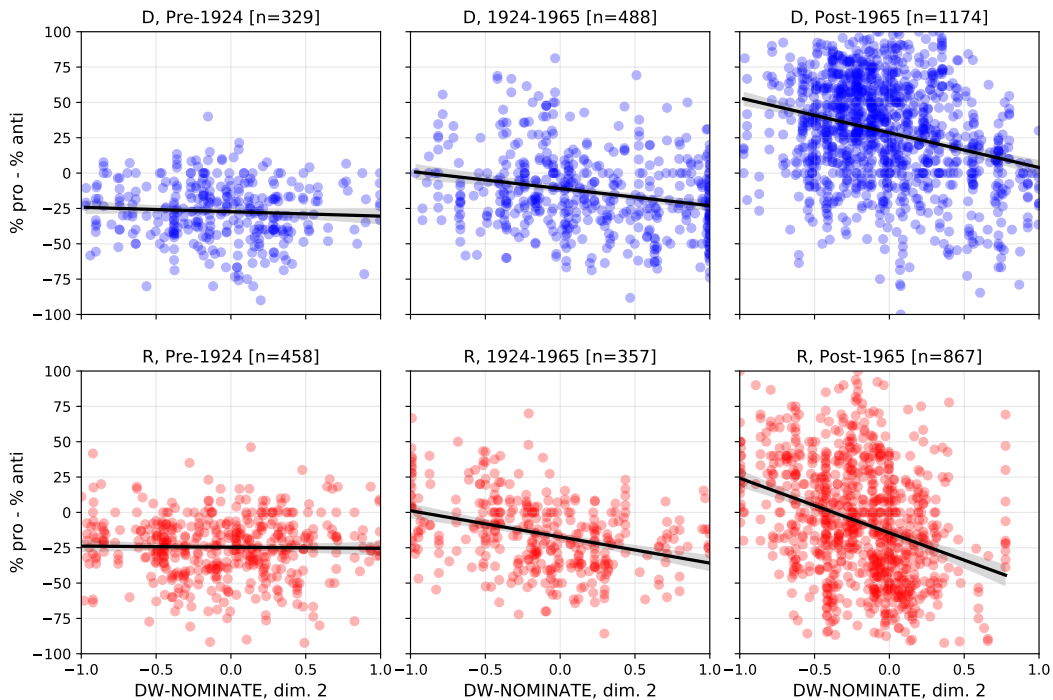

**Fig. S17.** Association between the mean tone of legislators with at least 10 speeches related to immigration (% pro - % anti) and the second dimension of DW-NOMINATE scores, in three time periods.

314 decreased, and fewer wanted levels increased. On average over the 12 surveys, 33% of respondents wanted immigration levels  
 315 kept at present, 16% wanted them increased, and 42% wanted them decreased (see Figure S18).

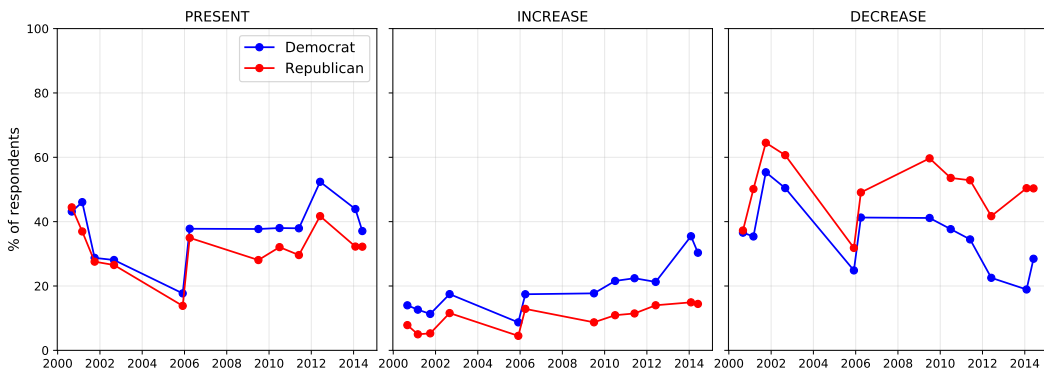

**Fig. S18.** Percent of respondents in each party who answered that they wanted immigration kept at present levels (left), increased (middle), or decreased (right).

316 **Regression Analysis.** We compared Congressional speeches to the public opinions data by aggregating both sources of data to  
 317 the year-by-state level. In particular, for a given year and state, we started with all of the immigration speeches made in that  
 318 year by members of Congress from that state, and computed the percentage of those speeches that our classifier labeled as  
 319 anti-immigration. Similarly, for each year and state, we also took all of the responses from Gallup survey(s) in that year by  
 320 individuals living in that state, and computed the percentage of responses that wanted immigration decreased.

321 We then report the relationship between the share of speeches that are anti-immigration and the share of respondents  
 322 who report wanting immigration decreased in a scatter plot (Figure S19), controlling for year fixed effects. Each observation  
 323 is weighted by the number of speeches in that state-year cell to address differences in precision across observations. The  
 324 relationship between these two variables is positive and the coefficient (represented by the slope of the line) is 0.278 (s.e. = 0.078).  
 325 In other words, within a state, as the local population reports attitudes that are more anti-immigration, political representatives  
 326 from that state are measured as making more anti-immigration speeches. This correlation does not tell us the direction of  
 327 the relationship between the local attitudes and political speeches—it could be that politicians are responding to changing  
 328 attitudes in the electorate, or that local residents are influenced by political elites—but we find the association between these  
 329 two state-level measures of attitudes toward immigration to be reassuring.

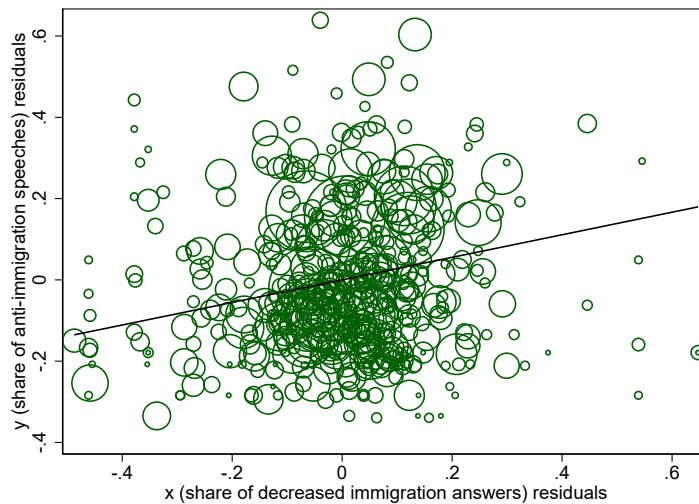

**Fig. S19.** Scatter plot of the relationship between the share of anti-immigration speeches and share of people wanting immigration to be decreased, after controlling for year fixed effects. Circle size indicates number of people polled at the state-year level.

### 330 Influence of C-SPAN and Elections

331 We conducted a supplementary analysis to test whether the divergence in attitudes toward immigration that we observed  
 332 between Democrat and Republican members of Congress could be partially explained by the introduction of technology, such  
 333 as C-SPAN, that allowed voters to watch Congressional speeches. If changes in Congressional speeches were driven by a  
 334 combination of C-SPAN and desire to appeal to voters, we hypothesized that after the introduction of C-SPAN in 1979, we  
 335 should see a difference in the tone of immigration speeches when elections were imminent versus further away.

336 **Regression analysis.** To analyze this, we focused on the House of Representatives. Representatives hold two-year terms, and  
 337 elections are held in the November of every even-numbered year. This simplified our analysis, since we could straightforwardly  
 338 compute the amount of time left until the next election.

339 In our first regression model, we aggregated immigration speeches to the level of year and party. For each year and party,  
 340 we kept all of the immigration speeches given in that year by members of the House in that party. We then computed our  
 341 average tone measure, i.e., the percentage of pro-immigration speeches minus the percentage of anti-immigration speeches. For  
 342 each party, we regressed average tone on the interaction of whether it was pre-1979 or post-1979 and whether it was an election  
 343 year (even) or non-election year (odd), with fixed effects for decades. We found for both parties that there was no significant  
 344 difference in tone between on- and off-election years, either pre-1979 (before C-SPAN) or post-1979 (after C-SPAN).

345 In our second regression model, we conducted a very similar analysis, but instead of simply indicating whether it was an  
 346 on- or off-election year, we provided as an independent variable the number of months until the next election. For example,  
 347 November in an even year mapped to 1, October mapped to 2, and so on, and December to 24. In an odd year, November  
 348 mapped to 13, October to 14, and so on, and December to 12. Again, we found no significant effect for either party: both  
 349 pre-1979 and post-1979, the number of months until the next election did not have a significant effect on average tone.

350 Thus, we did not find evidence that the polarization we observed could be explained by the advent of new technology like  
 351 C-SPAN and a desire to appeal to voters. In addition, Congressional Representatives seem to not be altering their tone with  
 352 respect to immigration in election years, which suggests that anti-immigration attitudes are not being driven primarily by  
 353 electoral cycles.

### 354 Countries, Regions, and Human Capital

355 To demonstrate that Figure 2 in the main paper (which plots tone over time for the three most frequently mentioned  
 356 nationalities—Italian, Chinese, and Mexican) is representative of broader regional trends, we create an equivalent plot here for  
 357 the corresponding regions (Europe, Asia, and Latin America) as shown in Figure S20. Specifically, we count mentions of the  
 358 45 most prominent countries, in terms of immigration to the U.S. For the sake of this figure, we take Latin America to be  
 359 the Spanish-speaking countries of Central, South America, and the Caribbean, including Mexico, and include mentions of  
 360 “Hispanic(s)” and “Latino(s)/Latina(s)” in identifying relevant speeches.

361 Although the resulting trends in tone are slightly different, with Latin America and Asia being slightly more positive than  
 362 Mexico and China, and Europe as a whole being slightly more negative than Italy, resulting in smaller gap between lines, the  
 363 overall pattern is consistent, with the tone in all regions rising mid-century, and mentions of immigration from Latin America  
 364 remaining more negative than the other regions.



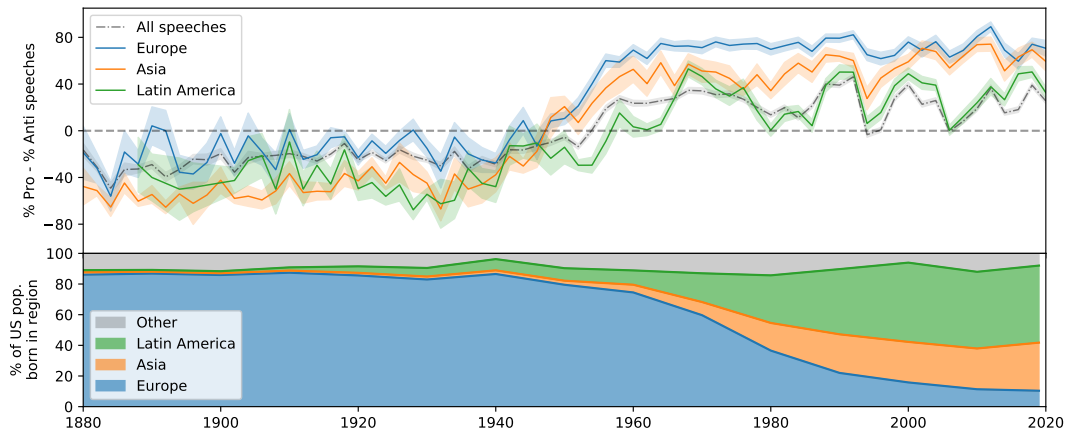

**Fig. S20.** Average tone of immigration speeches when considering only those that mention immigrants from three broad regions (top), and the percent of the US foreign born population from each of these regions over time (bottom).

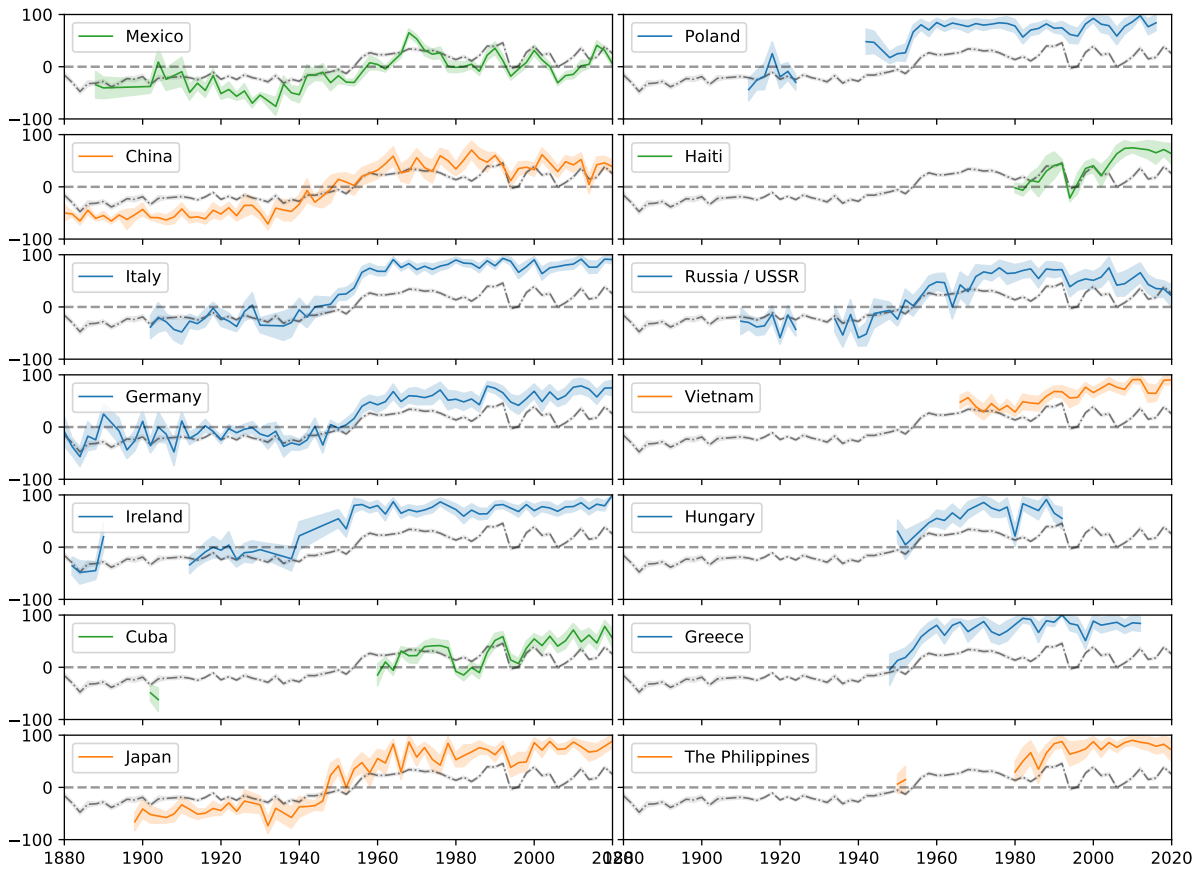

**Fig. S21.** Difference in frequency of pro minus anti immigration speeches for the fourteen most frequently-mentioned nationalities (excluding English, French, Indian, and Canadian), when considering only those speeches which mention a particular country or nationality. Although it is difficult to generalize from a limited number of countries, we see that most European countries groups are referred to positively by 1960s, most Asian countries by the 1980s, and countries from Central America and the Caribbean remaining negative until the 2000s or later (with Mexico remaining at or below the average tone until the present day).

365 Figure S21 shows the estimated tone per Congress for each of the fourteen most frequently mentioned nationalities, in order  
 366 (top to bottom, then left to right), excluding English, French, Indian, and Canadian (as speeches mentioning these terms tend  
 367 to include content not related to immigrants from the corresponding countries). Each time series shows the overall overall  
 368 tone (% pro - % anti) for all speeches that include mention of the country or nationality. Only sessions of Congress with at  
 369 least 20 relevant speeches for that nationality are shown. Bands show uncertainty estimates based on estimated proportion  
 370 of pro and anti speeches and the number of relevant speeches in that session of Congress. Colors indicate the region of the

371 country (blue is Europe, orange is Asia, and green is Central and South America and the Caribbean). As can be seen, nearly  
 372 all European countries had a mean tone that was higher than the overall tone average (for all immigration speeches) by 1960,  
 373 though less so for Germany and the USSR. By contrast, Asian countries did not achieve this until approximately 1980. Haiti  
 374 and Cuba only became more positive than the average in the 2000s, and Mexico is still at or below the overall average today.  
 375 The corresponding mention frequencies are shown in Figure S22.

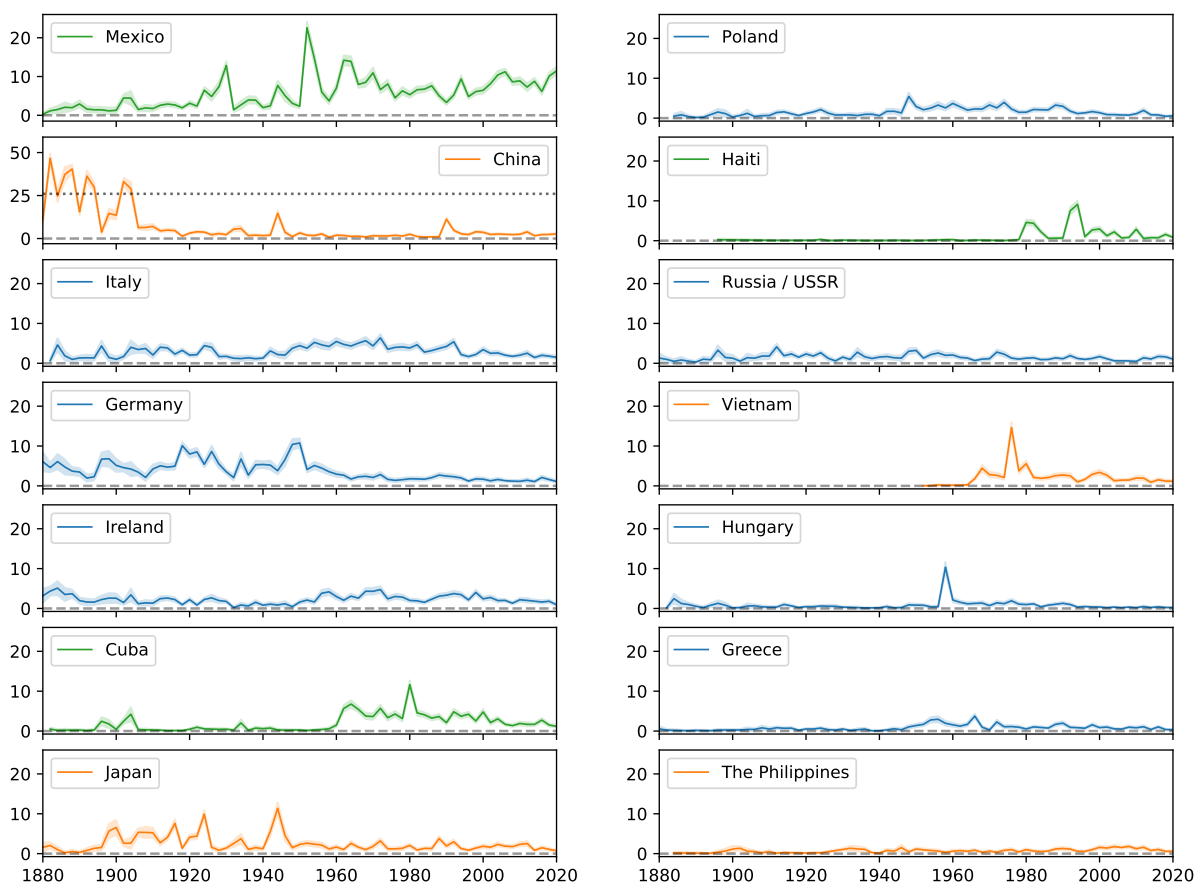

**Fig. S22.** Mention frequency over time (as a percentage of speeches) for each of the fourteen most frequently-mentioned nationalities within immigration speeches (i.e., number of immigration speeches mentioning a country or nationality as a percentage of the total number of immigration speeches). Color indicates region (Europe, Asia, or Central America and Caribbean). Note that the plot for China (one below the upper left) uses a different scale (with the comparable scale shown as a dotted line), as its maximum mention frequency is twice as high as the country with the next highest maximum frequency (Mexico).

376 **Regression Analysis.** In order to check whether these differences in tone can be explained by factors other than nationality,  
 377 such as human capital or the number of people emigrating from particular places, we include an additional analysis based on  
 378 micro-data from the U.S. Census, accessed via the IPUMS website.<sup>††</sup> Specifically, we include (a) the share of the population  
 379 composed of immigrants from these 14 countries of origin, and (b) the socio-economic status of these groups from 1880 to  
 380 2020.<sup>†‡</sup> We use the Duncan Socio-Economic Status Index (SEI) for part (b), a measure that is based on occupational data.

381 We report results from a regression with 14 countries of origin-by-decade observations. In each case, we calculate the share  
 382 of speeches about that country-of-origin in that decade that are pro-immigration or anti-immigration. Our dependent variable  
 383 is % pro - % anti, as in our main results (e.g., Figure 1). As explanatory variables, we include: (a) country-of-origin fixed  
 384 effects, (b) decade fixed effects, and (c) two additional attributes of the country-of-origin by decade (= share of the population  
 385 and socio-economic index). The country-of-origin fixed effects produce sensible results: speeches about immigrants from Europe  
 386 are the most positive, and speeches about immigrants from the Americas are the most negative. Speeches about immigrants  
 387 grow more positive over time (see Table S6).

388 We find that, controlling for these country-of-origin and decade fixed effects, groups that are becoming more numerous (%  
 389 of the population is rising) are spoken about more negatively, as are groups that are becoming higher in socio-economic  
 390 status (SEI is rising). The first pattern is quite sensible: we would expect that groups that are growing in size become more salient  
 391 and perhaps more worrying to the electorate. The second pattern is an interesting new finding and would need to be probed

<sup>††</sup> <https://www.ipums.org/>

<sup>†‡</sup> Note that there is no Census data available for 1890.

392 more in future work. One explanation could be that groups are spoken about very positively when they are refugees and  
 393 perceived to be in need of help (e.g., Cubans, Vietnamese) and this positive speech diminishes as the groups become perceived  
 394 to be made up of more “economic” migrants over time. Exploring these hypotheses in greater detail is beyond the scope of this  
 395 paper, but the patterns that emerge are interesting and worthy of further study.

|                                    | % pro - % anti      |
|------------------------------------|---------------------|
| % foreign population               | -0.007**<br>(0.003) |
| Average Duncan Socioeconomic Index | -0.012*<br>(0.006)  |
| <b>Country</b>                     |                     |
| Cuba                               | -0.040<br>(0.07)    |
| Germany                            | 0.250***<br>(0.06)  |
| Greece                             | 0.263***<br>(0.05)  |
| Haiti                              | -0.218**<br>(0.11)  |
| Hungary                            | 0.109<br>(0.09)     |
| Ireland                            | 0.321***<br>(0.05)  |
| Italy                              | 0.241***<br>(0.08)  |
| Japan                              | 0.123*<br>(0.07)    |
| Mexico                             | -0.270**<br>(0.11)  |
| Philippines                        | 0.221***<br>(0.07)  |
| Poland                             | 0.272***<br>(0.07)  |
| Russia                             | 0.073<br>(0.06)     |
| Vietnam                            | 0.199**<br>(0.09)   |
| Constant                           | -0.360***<br>(0.12) |
| Decade fixed effects               | Yes                 |
| Country fixed effects              | Yes                 |
| $R^2$                              | 0.89                |
| N                                  | 157                 |

**Table S6. Data is at the country and decade level. Each column shows the difference between the share of pro- and anti-immigration speeches regressed on the share of the foreign population and the average Duncan socioeconomic index by decade and country. The omitted country category is China. Standard errors are in parentheses. \*  $p < 0.1$  \*\*  $p < 0.05$ , \*\*\*  $p < 0.01$ .**

### 396 Immigration Topics

397 Figure S23 shows a set of 40 topics discovered using Latent Dirichlet Allocation (10), plotted in terms of the mean document  
 398 proportions over time. As can be seen, some are procedural (e.g., “act, section, amendment”), some group together nationalities  
 399 (e.g., “chinese, treaty, china, government, japanese”), some reflect aspects of the immigration debate that are relatively focus in  
 400 time (e.g., “education, school, students”), and some represent enduring issues (e.g., “tax, percent, budget”). Most however, are  
 401 relatively localized in time. Because of this, we choose to make use of semi-automatically constructed frames (tagged lexicons)  
 402 for measuring the prevalence of immigration frames across the entire time period (see below).

### 403 Curating Immigration Frames

404 In order to deepen our analysis of the language used in relation to immigrants, we constructed a set of fourteen immigration  
 405 “frames”, i.e., thematic groups of words used in association with immigrants, and measured their prevalence across parties,  
 406 across ethnic groups, and over time.

407 In this section, we discuss how we chose these fourteen frames to focus on, and how we constructed word lists for each  
 408 frame. Our approach consisted of three steps: (1) we applied computational methods to uncover all words that were used

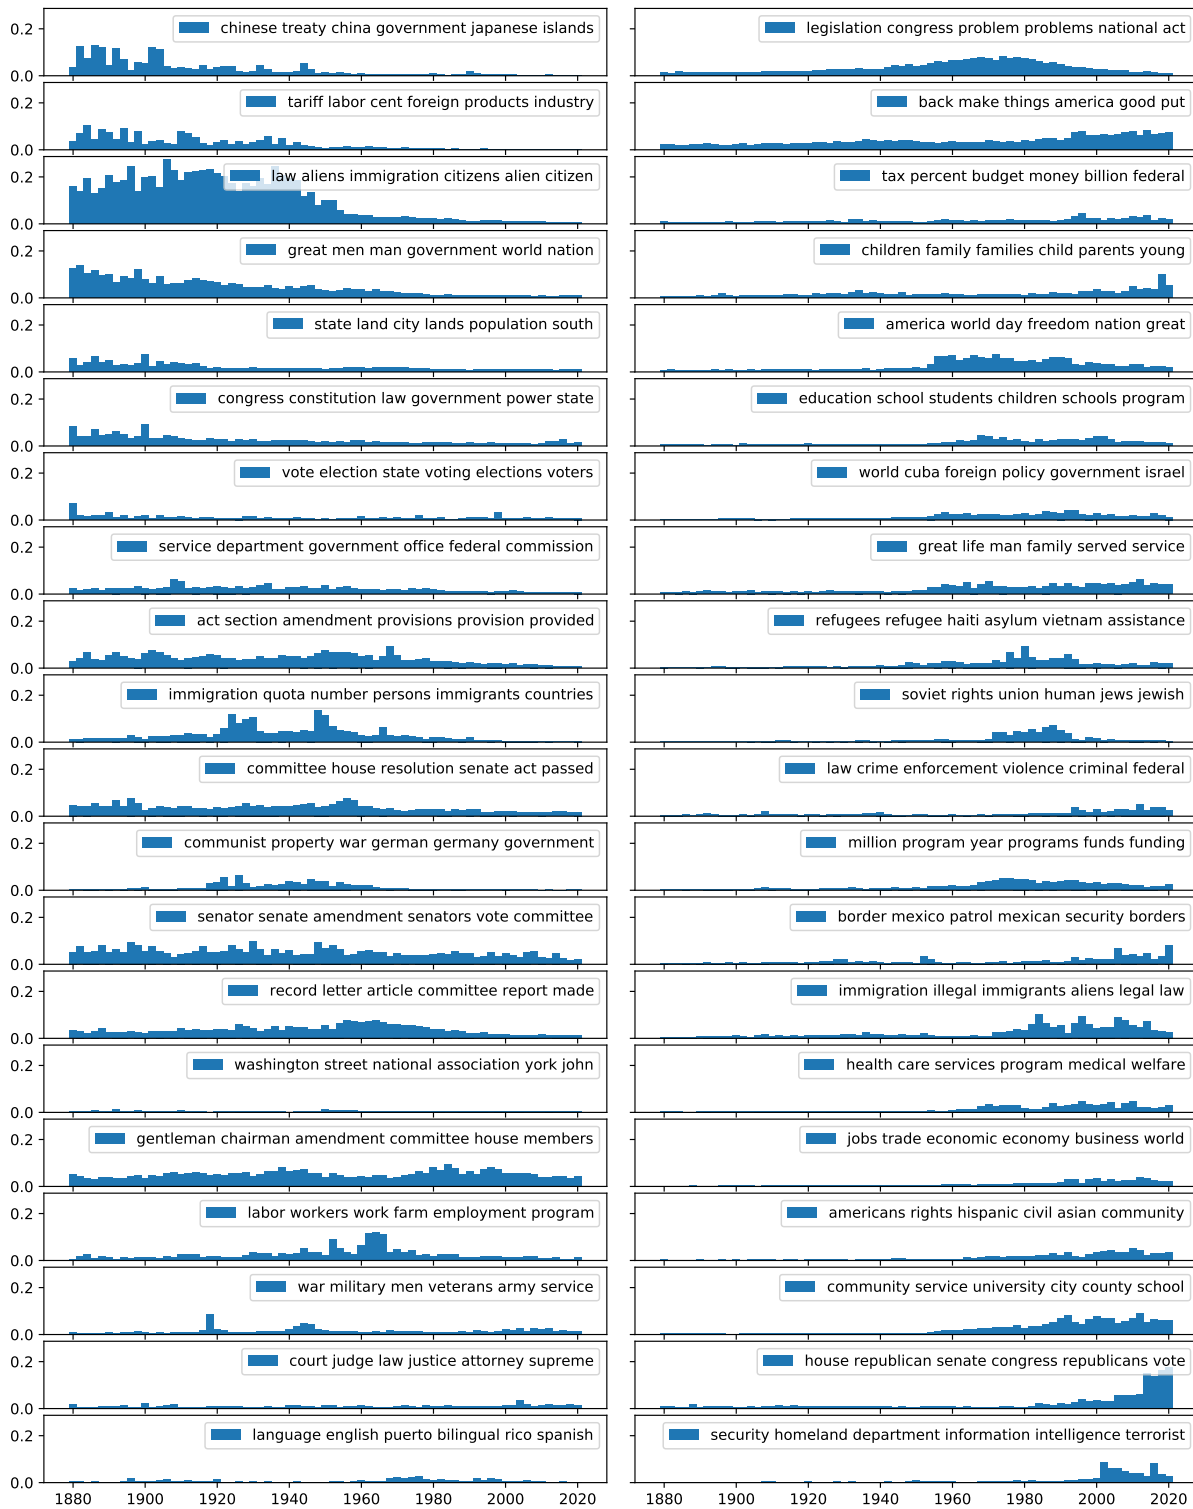

Fig. S23. Forty topics discovered using LDA, plotted in terms of average document proportions over time.

409 significantly more in reference to immigrants as opposed to generic people mentions (e.g, “man”, “woman”, etc.); (2) based on  
 410 a combination of automatic word clustering methods and hypotheses from the literature on immigration, we identified fourteen  
 411 relevant frames; (3) all authors on this paper manually annotated the immigrant-associated words to label each one with the  
 412 frame(s) that they belonged to.

413 **Identifying immigrant-associated words.** In the first step, our goal was to automatically identify all words used in association  
 414 with immigrants, i.e., words that were used significantly more frequently to modify immigrant terms than general person terms.  
 415 First, we constructed two groups of “anchor” terms, one of immigrant terms (e.g., “immigrant”, “emigrant”) and one of generic  
 416 terms related to people (e.g., “person”, “man”, “woman”), which also included the immigrant terms; we provide a full list of  
 417 these anchor terms in Table S7.

**Table S7. Anchor terms used to identify mentions of immigrants and generic mentions of people**

| Group      | Terms                                                                                                                                                                                                                                                                                                                                                                                                                                                                                                                                                                                                  |
|------------|--------------------------------------------------------------------------------------------------------------------------------------------------------------------------------------------------------------------------------------------------------------------------------------------------------------------------------------------------------------------------------------------------------------------------------------------------------------------------------------------------------------------------------------------------------------------------------------------------------|
| Immigrants | immigrant, emigrant, foreigner, alien, refugee                                                                                                                                                                                                                                                                                                                                                                                                                                                                                                                                                         |
| People     | man, woman, male, female, boy, girl, brother, sister, husband, wife, father, mother, son, daughter, parent, child, relative, adult, person, friend, resident, neighbor, worker, non-resident, inhabitant, farmer, laborer, merchant, manufacturer, lawyer, supervisor, slave, servant, consumer, owner, assistant, pauper, applicant, passenger, teacher, employer, inspector, student, employee, workman, writer, doctor, professor, immigrant, foreigner, pioneer, emigrant, alien, refugee, settler, widow, sailor, engineer, surgeon, miner, trader, cook, poet, earner, traveler, peasant, tenant |

418 To identify modifying words, we applied part-of-speech and dependency parsing to all of the sentences in the Congressional  
 419 speeches. For a given anchor term, we collected all adjectives, verbs, and nouns that appeared in the speeches with certain  
 420 dependency relations to the anchor term. For example, we collected all adjectives that were adjectival modifiers of the anchor  
 421 term, such as “illegal” in “illegal immigrants”. In Table S8, we list and provide examples of the dependency relations we  
 422 included for adjectives, verbs, and nouns. Using this approach, we collected two corpora,  $C_i$  and  $C_p$ , that consisted of all of  
 423 the words that appeared in one of these dependency relations relative to an immigrant anchor term or a person anchor term,  
 424 respectively. Note that  $C_i$  is a subset of  $C_p$  because the immigrant terms were a subset of the person terms.

**Table S8. Dependency relations used in identifying referring terms.**

| Part-of-speech | Dependency path to anchor      | Example                           |
|----------------|--------------------------------|-----------------------------------|
| Adjective      | <b>XX</b> –amod→ ANC           | <b>poor</b> immigrants            |
|                | <b>XX</b> –amod→ YY ←amod– ANC | <b>insane</b> alien paupers       |
| Verb (subject) | ANC –nsubj→ <b>XX</b>          | immigrants <b>come</b>            |
|                | <b>XX</b> –recl→ ANC           | immigrants who are <b>pouring</b> |
|                | <b>XX</b> –acl→ ANC            | immigrants <b>arriving</b>        |
| Verb (object)  | ANC –dobj→ <b>XX</b>           | <b>shut</b> out immigrants        |
|                | ANC –pobj→ YY –prep→ <b>XX</b> | <b>education</b> of immigrants    |
| Noun           | ANC –amod→ <b>XX</b>           | alien <b>flags</b>                |
|                | ANC –compound→ <b>XX</b>       | emigrant <b>passengers</b>        |

425 To identify terms that were significantly associated with immigrants, we compared the relative frequency of words in  $C_i$   
 426 versus  $C_p$ . Formally, for a given term  $w$  (defined by a lemma and a part-of-speech), we computed its relative “background”  
 427 frequency  $f_p(w) = c_p(w)/N_p$ , where  $c_p(w)$  is the count of the term in the person corpus  $C_p$  and  $N_p$  is the total number of words  
 428 in  $C_p$ . These terms are defined analogously for the immigrant corpus as  $f_i$ ,  $c_i$ , and  $N_i$ . Then, we computed the probability  
 429 of observing  $c_i(w)$ , the count of the word in the immigrant corpus, as a random sample from Binomial( $N_i, f_p(w)$ ). If this  
 430 probability  $p_w$  was low, this would indicate that the word was appearing significantly more frequently than we would expect if  
 431  $f_i(w) > f_p(w)$ , or significantly less frequently than we would expect if  $f_i(w) < f_p(w)$ , in relation to immigrants as opposed to  
 432 people in general.

433 We applied these methods to two representative periods of Congressional speeches, 1880-1929 (sessions 46-70) and 1965-2020  
 434 (sessions 89-116). For each period, we identified immigrant associations as the words that met the following criteria: (1)  
 435 its relative frequency  $f_i(w)$  in the immigrant corpus was higher than its relative frequency  $f_p(w)$  in the person corpus, (2)  
 436 its probability  $p_w$  was below 0.1, (3) it appeared at least 10 times in  $C_i$  and  $C_p$ . With these criteria, we were left with 70  
 437 adjectives, 138 verbs, and 160 nouns from the first period, and 156 adjectives, 289 verbs, and 331 nouns from the second period,  
 438 with 898 unique words (lemma and part-of-speech) in total. In Figure S24, we also visualize a subset of these words—the  
 439 “strongest” associations—for which  $f_i(w)$  was at least 5 times as large as  $f_p(w)$ .

440 **Identifying immigrant frames.** In our second step, our goal was to construct frames from among the immigrant-associated words.  
 441 We first approached this automatically, using a combination of word embedding and clustering techniques. In order to learn  
 442 word embeddings that were specific to the context of the Congressional speeches, we trained our own word embeddings on the  
 443 Congressional speeches using word2vec (11). As input to the word2vec model, we provided all of the immigration speeches  
 444 identified above.<sup>§§</sup> We fit 100 dimensional word embeddings using the gensim python package with the default word2vec  
 445 parameter settings (window size of 5, CBOW algorithm, etc.) using gensim (<https://radimrehurek.com/gensim/>).

<sup>§§</sup>The data used for this step (prior to manually classifying the framing terms) were actually based on a slightly earlier version of our classifiers, applied to a slightly different representation of the data, though the resulting set of terms is very similar.

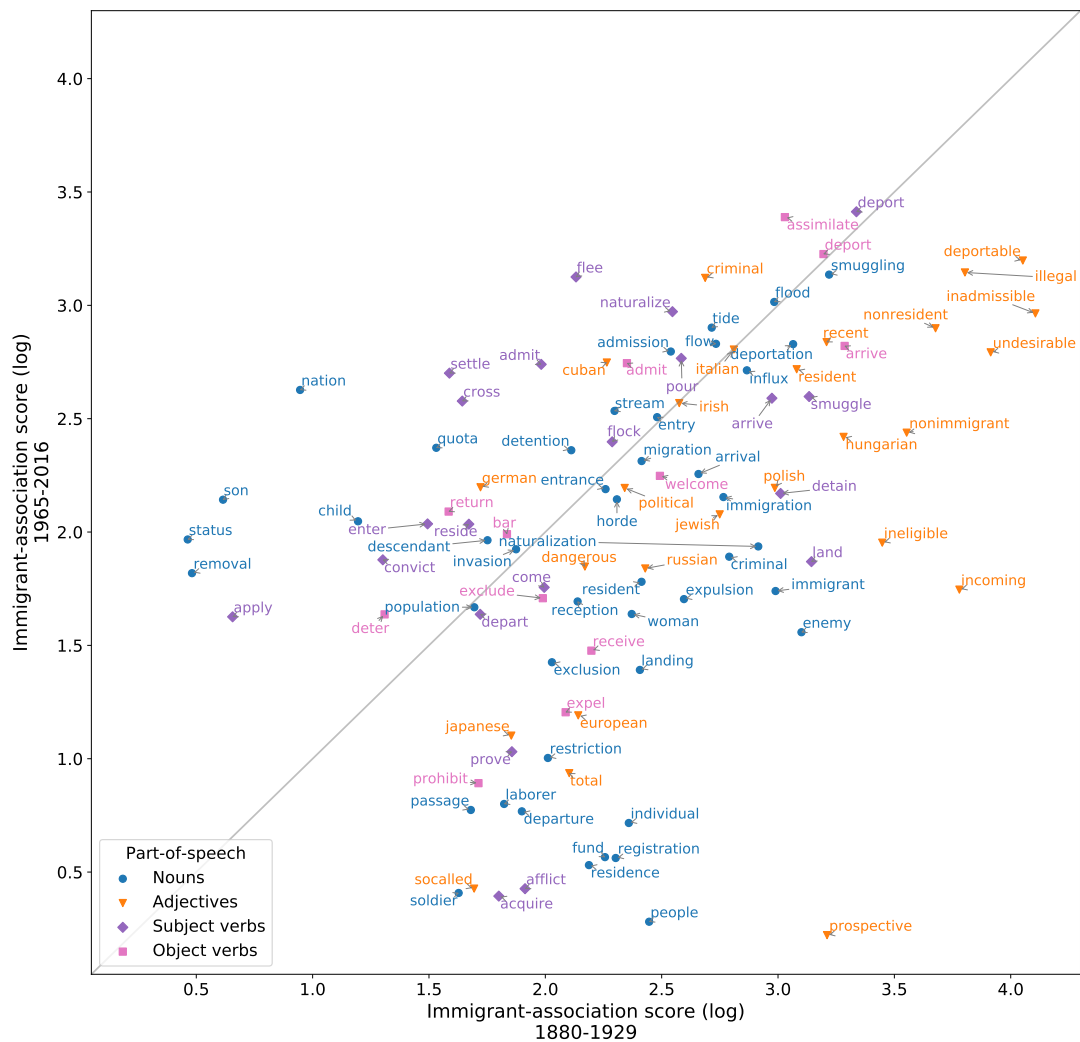

**Fig. S24.** Most immigrant-associated words from two contrasting periods. The score is the log of the frequency of the word in the immigrant corpus,  $f_i(w)$ , divided by the frequency of the word in the person corpus,  $f_p(w)$ , as defined in [Curating Immigration Frames](#), such that higher scores are terms that are more associated with immigrants. The x-axis shows the score in the earlier time period, and the y-axis the same score in the later period. From the 898 words that we kept (see [Table S8](#) for filtering criteria), we plot the words whose scores are at least 5 for one or both periods. The grey line indicates  $y = x$ ; falling above the line (e.g., the verb “flee”) means that the word was more associated with immigrants in the later period, falling below the line (e.g., the adjective “undesirable”) means that the word was more associated with immigrants in the earlier period.

446 Then, we gathered the word embeddings for each of the immigrant-associated words output in the previous step. To identify  
447 potential themes among these words, we ran k-means clustering on their word embeddings, with a range of possible cluster  
448 numbers ( $k = 10, 20, 30, 40$ ). Since k-means can get stuck at local minima (i.e., fail to find the globally optimal clustering), for  
449 each  $k$ , we ran the algorithm 50 times with random initialization, and kept the results that achieved the lowest within-cluster  
450 sum of squared errors. Through a qualitative review of the resulting word clusters, we found that using  $k = 30$  struck the right  
451 balance between finding detailed themes and producing decently-sized clusters with more than a handful of words. Furthermore,  
452 we found that this approach was able to identify many coherent word groups, such as clusters related to numbers, masses and  
453 water metaphors, family, exclusion, crime, legality, funding, employment, and nationalities.

454 However, the automatic clusters were imperfect; for example, there was still one very large cluster of over 130 words that  
455 were “left over” without any obvious theme, and there was an overemphasis in the automatic clusters on part-of-speech tags,  
456 such that several clusters were entirely verbs or adjectives (this was due to how word embeddings capture context in sentences).  
457 So, we decided to manually construct our own set of frames, but we used the themes surfaced by the automatic clustering  
458 to inform the frames that we chose. We also allowed our choices to be informed by themes discussed in the literature on  
459 immigration, and free-text comments provided by the annotators. Ultimately, we settled on fourteen frames, many of which  
460 overlapped with the automatic clusters: *Contributions*, *Victims*, *Family*, *Culture*, *Deficient*, *Crime*, *Threat*, *Economic*, *Labor*,  
461 *Legality*, *Quantity*, *Flood/Tide (Water)*, *Exclusion*, and *Migration*.

462 **Grouping words into frames.** In our last step, our goal was to annotate each of the immigrant-associated terms from step 1  
463 with the frame(s) from step 2, so that ultimately, each frame would correspond to a set of immigrant-associated terms. For  
464 each term, the annotator was required to choose at least one frame for the word (with a 15th option for “Other”), and could  
465 optionally choose a second frame as well if they felt that the term belonged to multiple frames. When labeling a word, the  
466 annotator was given the term’s lemma and part-of-speech (e.g., “flood” (verb)), and used their judgment about the word and  
467 its probable contexts, along with knowledge of the discourse around immigration, to make their determination.

468 Each of the 9 researchers on our team annotated a random sample of half or more of the 898 words. As a result, the large  
469 majority of words had at least 5 annotations, and every word had at least 3. Then, for each word and frame, we added the  
470 word to the frame’s word set if more than half of its annotators agreed that this word belonged to that frame. This meant that  
471 a word could end up in multiple frames; for example, the noun “terrorist” ended up in both the *Crime* and *Threat* frames.  
472 Using this word, 403 of the immigrant-associated words were added to at least one of the fourteen frames. *Exclusion* (n=49)  
473 was the largest resulting frame and *Deficient* (n=14) was the smallest.

474 Many of the frames that emerge from this process show a clear overlap with previously attested aspects of immigration  
475 rhetoric, and capture a mix of positive (e.g. *Contributions*), neutral (*Economics*, *Migration*), and negative (e.g., *Threats*), as  
476 well as the frequently deployed metaphors of a “flood” or “tide” of immigrants (e.g., “flood”, “flow”, “drain”, etc.). The full list  
477 of words, separated into their respective frames, are listed in Table S9.

## 478 Party and Group Comparison with Expanded Frames

479 Because our findings could be sensitive to the specific set of terms included in each frame, we provide two types of validity  
480 checks. First, all relevant figures provide the resulting values obtained (minimum and maximum) if we leave out each word in  
481 turn, demonstrating that, in almost all cases, no one word is solely responsible for the associations.

482 Second, to ensure that we have not missed any important terms in constructing these frames, we again use word vectors to  
483 find additional terms related to each frame, and redo our analysis. To find these additional terms, we again use word2vec (11)  
484 to train word vectors, this time using the immigration speeches, along with a random 20% of the rest of the corpus. For each  
485 frame, we identify up to 20 additional terms to add to that frame.

486 To get these related terms, we find the lemmas that are most similar to the average of the vectors for the manually-curated  
487 terms for a given frame (ignoring parts of speech). We then add the most similar terms (keeping all frequently occurring parts  
488 of speech for that term) if a) a term is among the most similar terms for a given frame; b) it is more similar to that frame than  
489 any other frame; and c) it is not already part of any of the manually constructed frames.

490 The full list of additional terms is given in Table S10. Figures S25 and S26 reproduce Figures 4 and 5 in the main paper  
491 after expanding the frame lexicons to include these automatically identified terms. As can be seen, using the expanded lexicons  
492 makes no meaningful difference to the trends we have observed.

493 Finally, we include an alternative to Figure 4 in the main paper, where we compare modern mentions of European immigrants  
494 to mentions of immigrants from all Latin American countries (which we define for the sake of this figure as Spanish-speaking  
495 countries of Central America, South America, and the Caribbean, plus Mexico), including mentions of Hispanic(s) and  
496 Latino(s)/Latina(s), rather than just immigrants from Mexico.

497 As can be seen in Figure S27, the results are similar, with *Family*, and *Victims* still being more associated with Europeans,  
498 and *Labor*, *Exclusion*, *Crime*, and *Legality* still being associated more with non-Europeans. However, with this comparison, we  
499 find no significant difference in the use of dehumanizing language, which further reinforces that Mexico holds a unique position  
500 within modern immigration discourse.

## 501 Quantifying Usage of Dehumanizing Metaphors

502 **Methodological details.** To identify more subtle dehumanizing metaphors, beyond the explicitly used framing of a “flood” or a  
503 “tide” of immigrants, we focus on a set of metaphors previously discussed in the literature on immigration, and make use of

**Table S9. Curated word lists for frames. Letters in parentheses indicate part of speech (n = noun, v = verb, a = adjective). Note that hyphens between words were dropped in preprocessing the speeches, hence the appearance of terms like “selfsufficiency (n)”.**

| Frame         | Curated Terms                                                                                                                                                                                                                                                                                                                                                                                                                                                                                                                                                                                                                                                             |
|---------------|---------------------------------------------------------------------------------------------------------------------------------------------------------------------------------------------------------------------------------------------------------------------------------------------------------------------------------------------------------------------------------------------------------------------------------------------------------------------------------------------------------------------------------------------------------------------------------------------------------------------------------------------------------------------------|
| Contributions | ability (n), attract (v), build (v), contribute (v), contribution (n), desirable (a), enlist (v), enrich (v), friendly (a), gain (v), genuine (a), hardworking (a), hero (n), highskilled (a), industrious (a), lawabide (v), loyal (a), patent (n), qualified (a), selfsufficiency (n), sturdy (a), veteran (n), worthy (a)                                                                                                                                                                                                                                                                                                                                              |
| Crime         | absconder (n), apprehend (v), arrest (n), arrest (v), bootlegger (n), capture (v), convict (v), criminal (a), criminal (n), criminalize (v), detain (v), detainee (n), felon (n), fugitive (a), gang (n), illegal (a), imprison (v), imprisonment (n), incarcerate (v), incarceration (n), inmate (n), jail (v), noncriminal (a), offense (n), parole (n), parole (v), prosecute (v), prosecution (n), smuggle (v), smuggler (n), smuggling (n), steal (v), terrorist (a), terrorist (n), unlawful (a), violent (a)                                                                                                                                                       |
| Culture       | americanization (n), assimilate (v), assimilation (n), background (n), christian (a), citizenship (v), culture (n), diverse (a), diversity (n), ethnic (a), flag (n), foreigner (n), heritage (n), integrate (v), integration (n), language (n), nation (n), race (n), society (n), tradition (n)                                                                                                                                                                                                                                                                                                                                                                         |
| Deficient     | aidsinfected (a), cheap (a), diseased (a), drunk (a), ignorant (a), illiteracy (n), illiterate (a), insane (a), insane (n), objectionable (a), slacker (n), undesirable (a), unfit (a), unskilled (a)                                                                                                                                                                                                                                                                                                                                                                                                                                                                     |
| Economic      | agricultural (a), allocation (n), bank (n), budget (n), buy (v), cash (n), cent (n), coin (v), compete (v), competition (n), corporation (n), cost (v), economic (a), finance (v), fund (n), funding (n), investor (n), owner (n), ownership (n), pay (v), property (n), purchase (v), reimbursement (n), sale (n), specie (n), tax (n), tax (v), taxpaye (v), taxpayer (n), workforce (n)                                                                                                                                                                                                                                                                                |
| Exclusion     | admissibility (n), allow (v), ban (n), ban (v), bar (n), bar (v), cap (n), ceiling (n), criterion (n), debar (v), deny (v), deport (v), deportable (a), deportation (n), deported (a), detain (v), deter (v), eligibility (n), excludable (a), exclude (v), exclusion (n), expel (v), expulsion (n), forbid (v), inadmissible (a), inspect (v), interdict (v), interdiction (n), limit (n), limit (v), limitation (n), overstay (v), prevent (v), prohibit (v), prohibition (n), quota (n), reject (v), removable (a), removal (n), requirement (n), restrict (v), restriction (n), screen (v), screening (n), shut (v), stop (v), unauthorized (a), vet (v), vetting (n) |
| Family        | ancestor (n), boy (n), child (n), daughter (n), descendant (n), descendent (n), family (n), familybased (a), familysponsored (a), generation (n), girl (n), grandchild (n), granddaughter (n), grandparent (n), grandson (n), household (n), husband (n), kid (n), marriage (n), marry (v), neighbor (n), neighborhood (n), orphan (n), parent (n), relative (a), relative (n), son (n), spouse (n), wife (n)                                                                                                                                                                                                                                                             |
| Flood/Tide    | absorb (v), absorption (n), drain (v), fill (v), flood (n), flood (v), flow (n), flow (v), inflow (n), influx (n), outflow (n), pour (v), spill (v), stream (n), stream (v), surge (n), tide (n), trickle (n), wave (n)                                                                                                                                                                                                                                                                                                                                                                                                                                                   |
| Labor         | agricultural (a), compete (v), competition (n), crewman (n), employ (v), employee (n), employer (n), employment (n), employmentbased (a), farmworker (n), hire (v), hiring (n), laborer (n), miner (n), nurse (n), tailor (n), unskilled (a), worker (n), workforce (n)                                                                                                                                                                                                                                                                                                                                                                                                   |
| Legality      | adjudication (n), amnesty (n), applicant (n), application (n), authorization (n), authorize (v), citizenship (n), citizenship (v), eligibility (n), eligible (a), exemption (n), familysponsored (a), hearing (n), identification (n), illegal (a), inadmissible (a), ineligible (a), law (n), lawful (a), legal (a), legalization (n), legalize (v), legalized (a), legitimate (a), license (n), naturalization (n), naturalize (v), overstay (v), permanent (a), prosecute (v), qualify (v), registered (a), registration (n), sponsor (n), sponsor (v), status (n), unauthorized (a), undocumented (a), unlawful (a), unnaturalized (a), verification (n), visa (n)    |
| Migration     | arrival (n), arrive (v), boatload (n), come (v), coming (n), convoy (n), cross (v), depart (v), departure (n), depot (n), destination (n), displacement (n), emigrate (v), enter (v), entrance (n), entry (n), exodus (n), flight (n), immigrate (v), incoming (a), land (v), landing (n), leave (v), migrate (v), migration (n), move (v), movement (n), passage (n), passenger (n), port (n), reenter (v), relocate (v), relocation (n), resettle (v), resettlement (n), resettling (n), return (n), return (v), route (n), seaman (n), settle (v), settlement (n), ship (v), shipload (n), station (n), transport (v), travel (v)                                      |
| Quantity      | additional (a), boatload (n), bulk (n), bunch (n), cap (n), count (n), count (v), counting (n), crowd (n), entire (a), estimate (n), estimate (v), estimated (a), flock (v), fraction (n), horde (n), increase (v), majority (n), many (a), mass (n), masse (n), million (n), more (a), most (a), much (a), number (n), number (v), percentage (n), proportion (n), shipload (n), statistic (n), sum (n), thousand (n), total (a), total (n), twothird (n)                                                                                                                                                                                                                |
| Threats       | aidsinfected (a), anarchist (n), apprehension (n), attack (n), attack (v), belligerent (n), blame (v), combatant (n), danger (n), dangerous (a), diseased (a), enemy (n), gang (n), horde (n), infect (v), invasion (n), overrun (n), problem (n), terrorist (a), terrorist (n), threaten (v), violent (a)                                                                                                                                                                                                                                                                                                                                                                |
| Victims       | acceptance (n), afflict (v), aid (n), aid (v), amnesty (n), assist (v), assistance (n), assisted (a), asylum (n), battered (a), compassion (n), deserve (v), desperate (a), escape (v), exploit (v), feed (v), flee (v), help (v), helpless (a), hope (v), hopeful (a), humanitarian (a), impoverished (a), languish (v), orphan (n), penniless (a), persecute (v), persecution (n), plight (n), prejudice (n), refuge (n), refugee (n), relief (n), rescue (v), reward (v), sanctuary (n), shelter (v), struggle (n), suffering (n), survivor (n), tragedy (n), unfortunate (a), victim (n), welcome (v)                                                                 |



**Table S10. Terms added to each of the frames using automated expansion as a validity check.**

| <b>Frame</b>  | <b>Automatic Expansion Terms</b>                                                                                                                                                                                                                                                                                                     |
|---------------|--------------------------------------------------------------------------------------------------------------------------------------------------------------------------------------------------------------------------------------------------------------------------------------------------------------------------------------|
| Contributions | energetic (a), enterprising (a), enterprising (n), entrepreneurial (a), intelligent (a), intelligent (n), motivate (n), motivate (v), patriotic (a), patriotic (n), productive (a), productive (n), productive (v), resourceful (a), selfreliant (a), selfrespecting (n), talented (a), thrifty (a), thrifty (n), welleducated (a)   |
| Crime         | adultery (n), apprehending (a), felonious (a), felony (n), habitual (a), indictable (a), informer (n), kidnap (v), kidnaping (n), kidnapping (n), larceny (n), manslaughter (n), murder (n), murder (v), murderer (n), offender (n), perjury (n), perpetrator (n), rapist (n), trumpedup (a)                                         |
| Culture       | amalgamation (n), americanism (n), anglosaxon (n), caste (n), caucasian (a), civilization (n), cultural (a), cultural (n), folklore (n), individuality (n), lineage (n), linguistic (a), mosaic (a), mosaic (n), multicultural (a), multiethnic (a), nationhood (n), pluralism (n), richness (n), tapestry (n)                       |
| Deficient     | addicted (a), degraded (a), depraved (a), idiot (n), idiotic (a), illegitimate (a), immoral (a), infected (a), institutionalized (a), lazy (a), lunatic (a), lunatic (n), obese (a), overweight (a), pauper (n), pauperism (n), unclean (a), uneducated (a), unemployable (a), unwanted (a)                                          |
| Economic      | capitalization (n), depreciation (n), financing (n), fnma (n), investment (n), loan (n), loan (v), loans (n), mortgage (n), mortgage (v), passthrough (n), payment (n), payments (n), premium (a), premium (n), sales (n), savings (n), subsidy (n), taxfree (n), taxfree (v)                                                        |
| Exclusion     | apply (n), apply (v), banning (n), circumvent (v), discourage (n), discourage (v), disqualify (v), inhibit (v), nullify (v), penalize (v), permit (n), permit (v), preclude (n), preclude (v), prohibiting (n), proscribe (v), remove (v), restricted (a), revoke (v), waive (v)                                                     |
| Family        | aunt (n), bride (n), brother (n), cousin (n), daughterinlaw (n), father (n), father (v), grandfather (n), grandfather (v), grandmother (n), mother (n), mother (v), motherinlaw (n), nephew (n), niece (n), parents (n), sibling (n), soninlaw (n), stepfather (n), stepmother (n)                                                   |
| Flood/Tide    | avalanche (n), deluge (n), deluge (v), drift (n), drift (v), flooding (n), hemorrhage (n), hemorrhage (v), infusion (n), inundate (v), inundation (n), melt (n), melt (v), overflow (n), overflow (v), seepage (n), swarm (n), swarm (v), tidal (a), torrent (n)                                                                     |
| Labor         | apprentice (n), artisan (n), bricklayer (n), electrician (n), employers (n), helper (n), journeyman (n), labor (n), labor (v), laborers (n), lowwage (n), mechanic (a), mechanic (n), parttime (n), seasonal (a), skilled (a), wages (n), workers (n), workman (n), workmen (n)                                                      |
| Legality      | admissible (a), admission (n), certificate (n), certificate (v), certification (n), conditional (a), disqualification (n), ineligibility (n), noncitizen (n), nonquota (n), nonresident (a), nonresident (n), probationary (a), qualifying (n), readmission (n), registry (n), residence (n), residency (n), revocation (n), vis (n) |
| Migration     | admittance (n), checkpoint (n), commute (n), commute (v), crossing (n), embarkation (n), emigrant (n), entering (n), evacuate (v), ingress (n), landed (a), locate (v), overland (n), repatriation (n), sail (n), sail (v), sailing (n), trek (n), unload (v), voyage (n)                                                            |
| Quantity      | aggregate (a), aggregate (n), aggregate (v), oneeighth (a), oneeighth (n), onefifth (a), onefifth (n), onefourth (a), onefourth (n), onehalf (a), onehalf (n), onehalf (v), onequarter (n), onesixth (n), onetenth (a), onetenth (n), onethird (a), onethird (n), onethird (v), percent (n), upwards (a)                             |
| Threats       | aggressor (n), alqaida (n), cowardly (a), deadly (a), hostile (a), hostile (n), infiltration (n), insidious (a), isis (n), jihadist (n), menace (n), menace (v), murderous (a), onslaught (n), sabotage (n), sabotage (v), terror (n), terrorism (n), terrorize (v), threat (n)                                                      |
| Victims       | desperation (n), destitute (a), destitute (n), destitution (n), downtrodden (a), downtrodden (n), hapless (a), impoverishment (n), misery (n), oppressed (a), oppression (n), povertystricken (a), povertystricken (v), privation (n), starving (n), succor (n), torment (n), torment (v), underprivileged (a), wartorn (a)          |

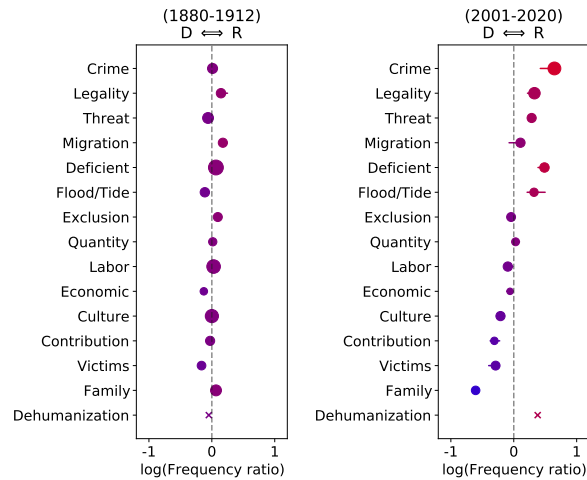

**Fig. S25.** Comparison of usage of frames by parties (reproducing the analysis in Figure 3 in main paper), when using the expanded frame lexicons combining words from Tables S9 and S10.

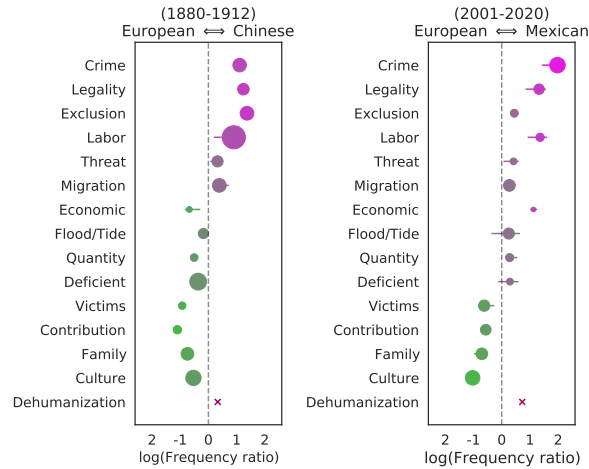

**Fig. S26.** Comparison of usage of frames based on groups mentioned (reproducing the analysis in Figure 4 in main paper), when using the expanded frame lexicons combining words from Tables S9 and S10.

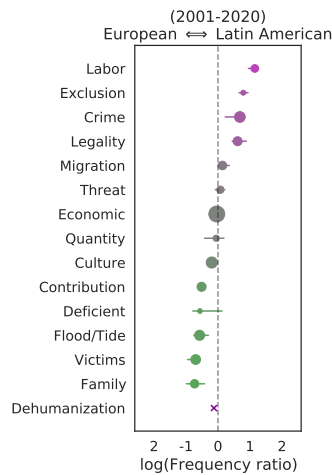

**Fig. S27.** Comparison of usage of frames based on groups mentioned (reproducing the analysis in Figure 4 in main paper), when comparing mentions of immigrants from Europe to immigrants from Mexico plus Spanish-speaking countries in Central America, South America, and the Caribbean, rather than just Mexico.

504 contextual embedding models to measure the extent to which mentions of immigrants “sound like” each of several metaphorical  
 505 category.

506 The basic idea of this method is illustrated in Figure S28. Contextual embedding models, such as BERT (12), are trained to  
 507 predict the identity of randomly masked words based on the surrounding context. Here, we repurpose the model by intentionally  
 508 masking entire mentions of immigrants (which could be, for example “aliens” or “Mexican nationals”, etc.), and computing the  
 509 probability—according to the model—that each word in its vocabulary would serve as a replacement for the mask. By adding  
 510 up the probabilities for a set of words which we have previously identified as being representative of particular categories, we  
 511 get an estimate of how much a particular mention suggests the corresponding metaphor. In Figure S28, for example, the  
 512 reference to “dumping” something “into this country” suggests that words in the *Cargo* category would be likely replacements.

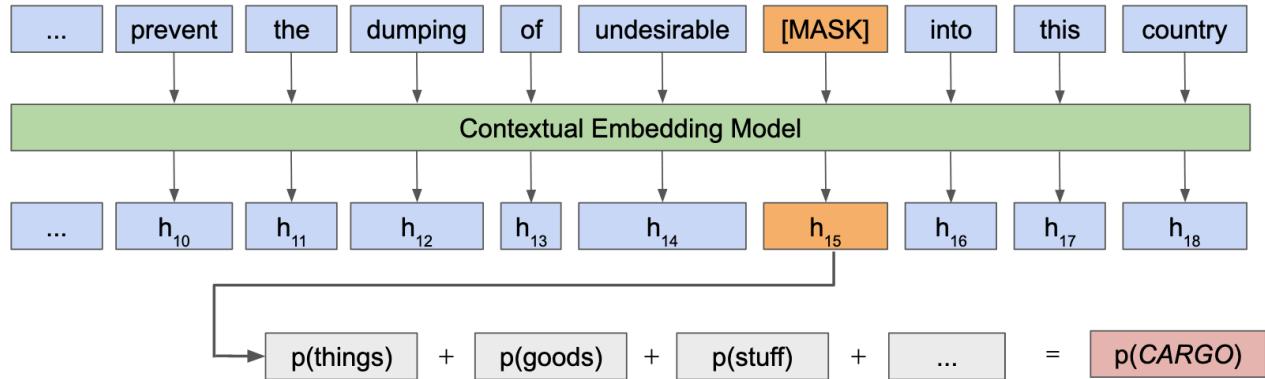

Fig. S28. Schematic depiction of our method for measuring metaphorical language, here showing an example which activates the *Cargo* category.

513 **Target terms.** Because BERT has a relatively constrained vocabulary (of approximately 30,000 tokens, representing both whole  
 514 words and word pieces), we can easily identify the tokens in the vocabulary that are appropriate for each category. Beginning  
 515 with an initial set, we use static embeddings to look for semantically similar terms, and then limit the list to those that are in  
 516 the BERT vocabulary as whole words. The full set of terms we use as targets for each of the metaphorical categories are given  
 517 in Table S11.

518 The table also includes a set of random control terms. To choose these, we counted the occurrence of all words that occur as  
 519 nouns in the Congressional Record (after parsing it with spaCy), and restricted the possible set to those words that occur at  
 520 least 1000 times, and those that exist as whole words in the BERT vocabulary. We then selected a random set of 50, excluding  
 521 all terms that had previously been used in identifying immigrants, nationalities, or other metaphorical categories. Finally, we  
 522 noted that the resulting random list included the word “humans”. Since this term would account for most of the probability  
 523 mass for the *Random* category, we exclude this term, although leaving it in leads to similar results.

524 **Trends over time.** Applying these to all mentions of immigrants (see Sections Methods and Materials in main paper), we  
 525 can compute the average probability for each category across mentions by party in each session of Congress. The raw log  
 526 probabilities for all metaphorical categories decline over time. However, in order to correct for unrelated factors which might  
 527 explain this decline (e.g., due to older data being less similar to the data that BERT was trained on, or factors related to the  
 528 Congressional Record itself), we also make use of a set of random control terms to correct for this, as described above.

529 In more detail, to estimate the prevalence of contexts which cue these metaphors over time, we compute the average log  
 530 probability assigned to all terms in each category at each point in time (across contexts), and divide by the number of terms in  
 531 the metaphorical category. We then repeat this for the terms in the *Random* category. Finally, we plot the log of the ratio  
 532 between these two, which is equivalent to the log of the first minus the log of the *Random* category, as shown in Figure S29.

More formally, for a set of  $N$  contexts (mentions of immigrants), we compute the relative log probability for metaphor  $m$  as,

$$\text{relative log prob} = \log \left( \frac{\sum_{i=1}^N \sum_{w \in W_m} p(w | c_i)}{N \cdot |W_m|} \right) - \log \left( \frac{\sum_{i=1}^N \sum_{w \in W_r} p(w | c_i)}{N \cdot |W_r|} \right),$$

533 where  $c_i$  is the  $i^{\text{th}}$  context,  $W_m$  is the set of words associated with metaphor  $m$ ,  $|W_m|$  is the number of terms in that category,  
 534  $W_r$  is the set of terms in the *Random* category, and  $p(w | c_i)$  is the probability assigned to word  $w$  in context  $c_i$  with the  
 535 masked mention.

536 After correcting for changes in random terms, we see in Figure S29 that in fact there is no significant increase or decrease in  
 537 dehumanizing metaphors over time. In addition, we can see that the *Animal* and *Cargo* words are the most prominent. By  
 538 contrast, the *Vermin* terms are actually less likely than random terms, on average, though we still see that they are significantly  
 539 more likely in speeches by Republicans than Democrats in the past two decades.

**Table S11. Target words used for each of our metaphorical categories**

| Metaphor     | Terms in BERT vocabulary                                                                                                                                                                                                                                                                                                                                                                                                                                        |
|--------------|-----------------------------------------------------------------------------------------------------------------------------------------------------------------------------------------------------------------------------------------------------------------------------------------------------------------------------------------------------------------------------------------------------------------------------------------------------------------|
| Animals      | animal, animals, beast, beasts, brute, cattle, cow, cows, dog, dogs, herd, herds, hog, horse, horses, livestock, pig, pigs, sheep                                                                                                                                                                                                                                                                                                                               |
| Cargo        | thing, things, object, objects, cargo, goods, merchandise, item, items, commodities, packages, products, baggage, shipment, shipments, stuff, material                                                                                                                                                                                                                                                                                                          |
| Disease      | disease, diseases, virus, viruses, infection, infections, illness, illnesses                                                                                                                                                                                                                                                                                                                                                                                    |
| Flood/Tide   | flood, flooding, floods, ocean, oceans, river, rivers, stream, tide, tides, water, waters, wave, waves                                                                                                                                                                                                                                                                                                                                                          |
| Machines     | machine, machines, machinery, equipment, apparatus, appliances, hardware, engine, engines, tool, tools, device, devices                                                                                                                                                                                                                                                                                                                                         |
| Vermin/Pests | rat, rats, worm, worms, bug, bugs, parasite, parasites, insect, insects, pest, flea, rodents                                                                                                                                                                                                                                                                                                                                                                    |
| Random       | adoption, aerial, agricultural, amtrak, announcements, antenna, brave, cadet, captures, carroll, champaign, charley, ecosystem, excuses, exit, french, freshman, goal, headache, inter, knock, liberty, lifeboat, london, manifest, mrs, multimedia, narcotics, nitrate, orr, ow, parliamentary, plantation, proof, protect, provider, ready, reese, revolutionaries, ribbons, san, sanders, satisfaction, scope, series, sucker, superstructure, whig, whiskey |

540 In addition, if we do the same comparison between groups (e.g., Republicans vs. Democrats) as we did for the dehumanizing  
541 metaphors, but using the *Random* category, we find that all comparisons are either not significant or show the opposite sign of  
542 the differences observed between parties and groups. Thus, we are confident that the observed differences are real, and report  
543 them without correction.

544 **Examples.** To provide intuition about the types of mentions found using this method, examples of sentences which cue the  
545 *Animal* metaphor are given in Table S12. Note that some examples also illustrate the presence of OCR errors in older data (see  
546 Methods and Materials in main paper).

547 **Validation.** To further validate that this method is picking up on types of language that humans would also see as indicating the  
548 presence of particular metaphorical categories, we collect annotations on a small number of examples for the *Animal* category.  
549 Using the full set of relevant mentions in the context, we sort them by combined log probability from the model for all animal  
550 terms, and draw a stratified set of 84 examples from across the distribution. We oversample the upper part of the distribution,  
551 as most examples have relatively low probabilities assigned to these words.

552 As a comparison set, we also identify all mentions of the target words in the *Animal* category in speeches about immigration,  
553 and embed all of these in the same way, again computing the probability assigned by the model to words in the category. Using  
554 the same stratification, we draw a sample of 42 words from these examples.

555 Four authors from this paper annotated these examples, with each example being annotated by two annotators, assigning  
556 an equal number to all possible pairings. Annotators were only shown the context and the [MASK] token, not the word or  
557 span that had been masked. The task was to identify all contexts where an animal term would be a plausible replacement for  
558 the [MASK] token, and for which there was some contextual cue that made it a plausible replacement. Overall agreement  
559 among annotators was 0.59 using Krippendorff’s alpha.

560 For both the immigrant mentions, and the embeddings of literal animal terms, there is a strong correlation between average  
561 human rating (1 = yes, animal is a plausible replacement; 0 = no) and log probability from the model ( $r = 0.73$  and  $0.63$ ,  
562 respectively, using Pearson correlation). Figure S30 shows a boxplot of log probabilities, plotted in terms of average human  
563 rating, for both immigrant mentions and animal terms. With the exception of a few outliers, those examples identified by  
564 humans as cueing the animal metaphor also have high probability from the model, and vice versa.

565 Looking at the list of examples given in Table S12, we note that some of the animal examples seem to be picking up on  
566 mentions of farms and ranches. In order to ensure that our results are not confounded by differences in how the two parties  
567 talk about agriculture in relation to immigration, we investigate these mentions in more detail.

568 To better understand what terms are driving our measurements of mentions of immigrants as suggestive of an *Animal*  
569 metaphor, we take all of the mentions of immigrants from the past two decades, and train a basic bag-of-words logistic regression  
570 model to differentiate between those that are found to be relatively highly indicative of this metaphor (the top quartile) and  
571 the rest. The resulting model shows that some of the most heavily weighted words are indeed related to agriculture, with  
572 the most heavily weighted among the agricultural terms being “agricultural”, “dairy”, “agriculture”, and “farm”. We then  
573 check the frequency of these terms within the contexts of immigration mentions from this time period among those speeches by

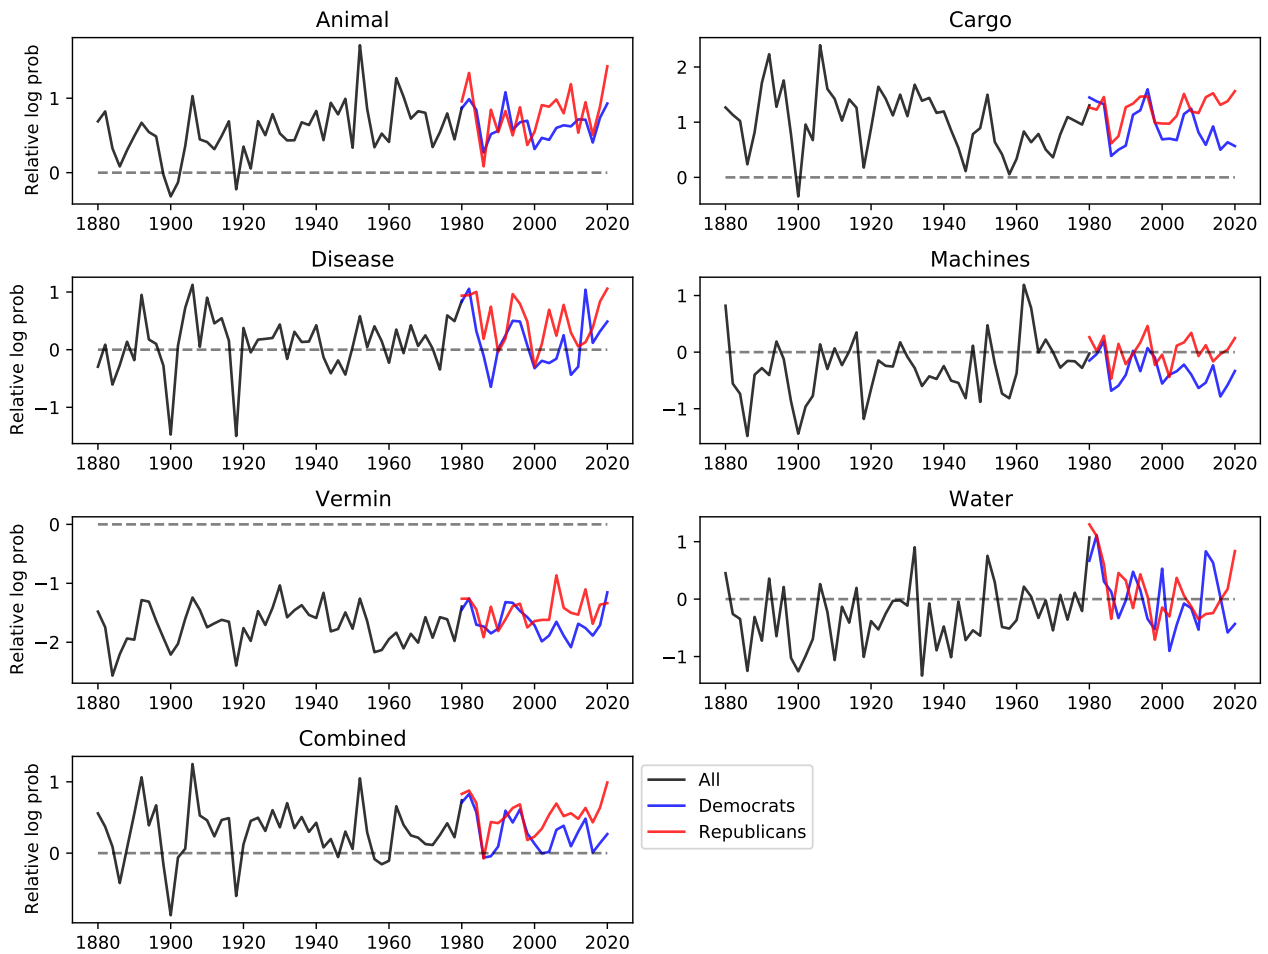

**Fig. S29.** Average relative log probabilities for each dehumanizing metaphor (as well as overall) for mentions of immigrants over time. Black lines show overall logged average probability prior to the period of polarization; red and blue lines show the averages for Republicans and Democrats, respectively. All lines represent the log of the average probability per word in the metaphorical category relative to the average probability per word for a set of random terms. For most metaphors, probabilities are significantly higher for Republicans (relative to Democrats) in the past two decades, but there is no significant increase or decrease in the overall probability of dehumanizing metaphors over time.

**Table S12. The 12 contexts (and corresponding mention terms) most strongly suggestive of the *Animal* metaphor. Cumulative probability is the sum of probabilities assigned by the model to all words in the *Animal* category (see Table S11).**

| Cumulative probability | Year | Masked term       | Context                                                                                                                                                                                                                                                                                                                                                                                                                                                 |
|------------------------|------|-------------------|---------------------------------------------------------------------------------------------------------------------------------------------------------------------------------------------------------------------------------------------------------------------------------------------------------------------------------------------------------------------------------------------------------------------------------------------------------|
| 0.97                   | 1906 | immigrants        | in the breeding of our live stock of every description . and it would be just as unreasonable to claim that we will not lower american standards by admitting to our country [MASK] that are of lower standards than ours as it is to assert that the breeding of the thoroughbred kentucky horses will not be injured by breeding them with texas mustangs .                                                                                           |
| 0.90                   | 1961 | migrants          | still another instance of inadequate reporting is brought to my attention in the murrowfriendly production which referred to the regulation of transportation of produce and cattle . and then goes on to say thatonly six states have laws providing for the safe transportation of [MASK] within their borders .                                                                                                                                      |
| 0.87                   | 1939 | aliens            | the destruction of these homes by a ruthless government . cruel separation of families . and the herding of these [MASK] in stockades is pictured .                                                                                                                                                                                                                                                                                                     |
| 0.82                   | 1963 | Mexican nationals | it was enacted at that time in order to provide effective control procedures for the movement of [MASK] into the farmlands in the united states .                                                                                                                                                                                                                                                                                                       |
| 0.80                   | 1947 | Cuban men         | it happened to b - general weyler . who was herding [MASK] . women . and children in concentrados .                                                                                                                                                                                                                                                                                                                                                     |
| 0.71                   | 1952 | wetbacks          | the time required to prepare evidence . travel possibly hundreds of miles to a district immigration office to secure a warrant and return to make a search . would give ample time for the offending farm or farms to move their [MASK] out or lend them to a neighboring farm long before the enforcement officer could hope to put the warrant into the limited effect possible .                                                                     |
| 0.70                   | 1882 | Jews              | mr . speaker . it was left for that broadminded ___ who wrote so splendidly the protestant history of england to say . when the jewish disability act was under discussion in the english par ] iament . that for ages it had been the custom to call these men cursed [MASK] . dogs of ___ . but that the nation which could boast of isaiah among its poets and the maccabees along its generals could not be derided by any englishspeaking people . |
| 0.70                   | 2010 | illegals          | rancher john ladd counted some 350 [MASK] on his san jose ranch over a period of 18 days before this newspaper interview .                                                                                                                                                                                                                                                                                                                              |
| 0.70                   | 1952 | aliens            | between these two large farming operations . thousands of [MASK] have been taken over the last year from this area alone .                                                                                                                                                                                                                                                                                                                              |
| 0.68                   | 2019 | migrants          | for months . communities in texas have requested help in feeding . transporting . and sheltering these [MASK] .                                                                                                                                                                                                                                                                                                                                         |
| 0.66                   | 1996 | aliens            | it establishes a positive framework to prevent illegal [MASK] from feeding at the public trough .                                                                                                                                                                                                                                                                                                                                                       |
| 0.64                   | 2002 | illegals          | border rancher george morgan encounters thousands of [MASK] crossing his ranch on a wellused trail .                                                                                                                                                                                                                                                                                                                                                    |

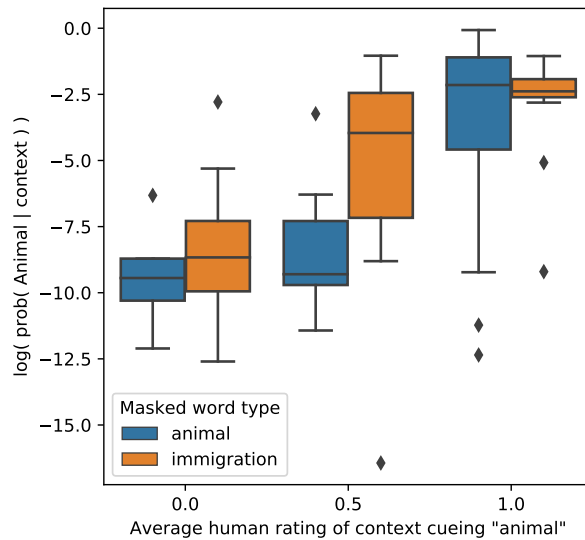

**Fig. S30.** Boxplot of cumulative log probabilities for terms in the *Animal* category (y-axis) divided into three categories based on human annotations (average of two binary ratings, where 1 = animal is a plausible replacement). Colors further divide those into examples where the masked token was originally a mention of immigrants (orange/right) vs those that were originally an animal token (blue/left). As expected, the model predicts that animal terms are more likely as replacements for examples where human annotators also think that an animal term is appropriate, for both types of examples.

574 Democrats and Republicans. For the sake of completeness, we consider the four terms mentioned above, along with singular  
 575 and plural forms of “farm”, “farmer”, “ranch”, and “ranchers”. The mention frequencies by party are shown in Figure S31.

576 As can be seen, there is indeed a difference between the parties in terms of how frequently they refer to some of these terms  
 577 in the context of immigration. However, the differences are somewhat symmetric, with Democrats referring more to farms and  
 578 farmers, and Republicans referring more to ranches and ranchers. Moreover, among the most highly weighted among these  
 579 terms, two are more frequently used by Democrats (“farm” and “dairy”), and two are more frequently used by Republicans  
 580 (“agriculture” and “agricultural”). As such, we do not believe that the difference between the parties in terms of how much  
 581 their mentions of immigrants cue the “animal” metaphor is driven primarily by a difference in their respective references to  
 582 certain agricultural terms.

583 To be doubly sure, we re-run the metaphorical analysis after masking out all of the agriculture-related words listed in Figure  
 584 S31 (i.e., replacing those tokens with “[MASK]”). Although the numbers change slightly, this does change any of our conclusions.  
 585 In particular, rounded to the nearest decimal, the resulting probability ratios (for the combined dehumanization metric) remain  
 586 the same: 1.4 for Chinese:European in the early time period, 1.9 for Mexican:European in the past two decades, and 1.6 for  
 587 Republicans:Democrats in the past two decades, with no significant difference between the parties in the earlier time period.

588 Finally, to verify that the observed differences in the use of dehumanizing metaphors are not excessively influenced by the  
 589 fact that BERT was trained on modern data, we repeat the analysis using HistBERT—a version of BERT that has been  
 590 fine-tuned to historical data, covering the entire 20th Century (13). Although this produces slightly different values, the results  
 591 are essentially unchanged. The corresponding ratios when using HistBERT are 1.3 for Chinese:European ( $p = 0.0019$ ), 2.2 for  
 592 Mexican:European ( $p < 0.001$ ), and 1.6 for modern Republican:Democrat ( $p < 0.001$ ), with no significant difference between  
 593 parties in the earlier time period.

## 594 Temporal Analysis of Frames

595 Although our use of immigration frames in the main paper is restricted to testing differences between parties and groups, they  
 596 also allow us to study broader changes over time in how immigration is discussed. To do so, we plot the combined frequency of  
 597 terms associated with each frame (with the appropriate part of speech tags), both in speeches about immigration, and in all  
 598 non-procedural speeches (Figure S32).

599 Although the comparison is imperfect (because non-procedural speeches that are not about immigration represent a variety  
 600 of different types of speech, not just those about comparable issues), we use the relative frequency, measured using pointwise  
 601 mutual information (PMI), to measure how salient each frame was to the issue of immigration over time (Figure S33). To  
 602 make the PMI scores comparable across sessions of Congress (which differ in the total number of tokens), we normalize these  
 603 scores by dividing by the PMI score for the term “immigration”, which almost never occurs except in speeches that have been  
 604 classified as being about immigration (hence the use of “Scaled PMI” in these figures). We also use PMI to show the divergence  
 605 between the parties on framing over time (Figure S34) and the overall trends for each party (Figure S35). Figures S33 and S34  
 606 again use the technique of leaving out each word in turn, and keeping the minimum and maximum values, in this case plotted  
 607 as bands around the main line.

608 Over the past 150 years, in speeches about immigration, we find significant increases in the raw frequency of terms associated

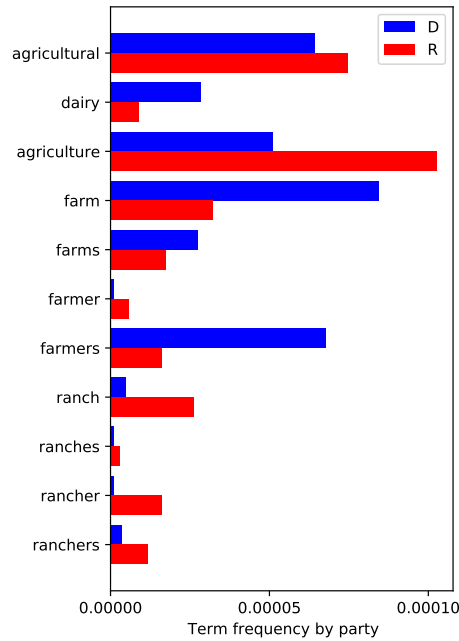

**Fig. S31.** Mention frequencies, by party, of agriculture-related words, in segments mentioning immigration from the past two decades. As can be seen, there is a difference between the parties, but this is not likely to explain the differences in our dehumanization metric, given that Republicans mention ranching more, whereas Democrats mention farming more.

609 with *Victims*, *Family*, *Legality*, *Quantity*, *Crime*, *Threats*, and *Contributions* (all significant at the  $p < 0.001$  level; see Figure  
 610 S32). For many of these frames, however, the frequency of the associated terms have also become more common in all  
 611 non-procedural speeches. As a result, the only frames that show a significant increase in their association with immigration (as  
 612 measured using PMI) are *Crime*, *Legality*, and *Victims*. Although each of these frames has always had some association with  
 613 immigration, these associations have grown much stronger over time.

614 For *Legality*, this was driven partly by the rise in mentions of “illegal immigrants”, but also relates to the expansion of  
 615 the immigration bureaucracy, including issues related to visas and naturalization. The term of “illegal” also contributes to  
 616 the growing association with *Crime*, but this association also depends on the popularly expressed notion that immigrants are  
 617 bringing “drugs”, committing “crimes”, and connected to “terrorism”.

618 By contrast, the only frame for which there has been a significant decline in raw frequencies within immigration speeches is  
 619 *Deficient*, which was once extremely common due to references to immigrants said to be “illiterate”, “diseased”, or “undesirable”.  
 620 However, several frames show a significant relative decline in their association with immigration (measured using PMI),  
 621 including *Deficient*, *Culture*, *Threats*, *Family*, *Labor*, *Contributions*, and *Economics*, as the terms associated with these frames  
 622 have become relatively more frequently used in non-immigration speeches.

623 As expected, nearly all frames show a positive association with immigration during this time, because of how they were  
 624 constructed (beginning with terms which referred to immigrants more frequently than generic person mentions). The one  
 625 exception to this is *Economics*. Although economic terms are common in speeches about immigration, they are yet more  
 626 frequent in non-immigration speeches, and this effect is stronger now than in the past, hence the significant decline in this  
 627 association. For the differences between parties, these results largely match those that are shown in Figure 3 in the main paper.  
 628 As shown in Figure S34, however, we can see that all of these differences have grown stronger over time since the 1980s. Those  
 629 frames which show significant relative increases among Republicans since 1980 are, *Deficient*, *Crime*, and *Flood/Tide*. Those  
 630 which show significant relative increases among Democrats over the same time period are *Family* and *Contributions*.



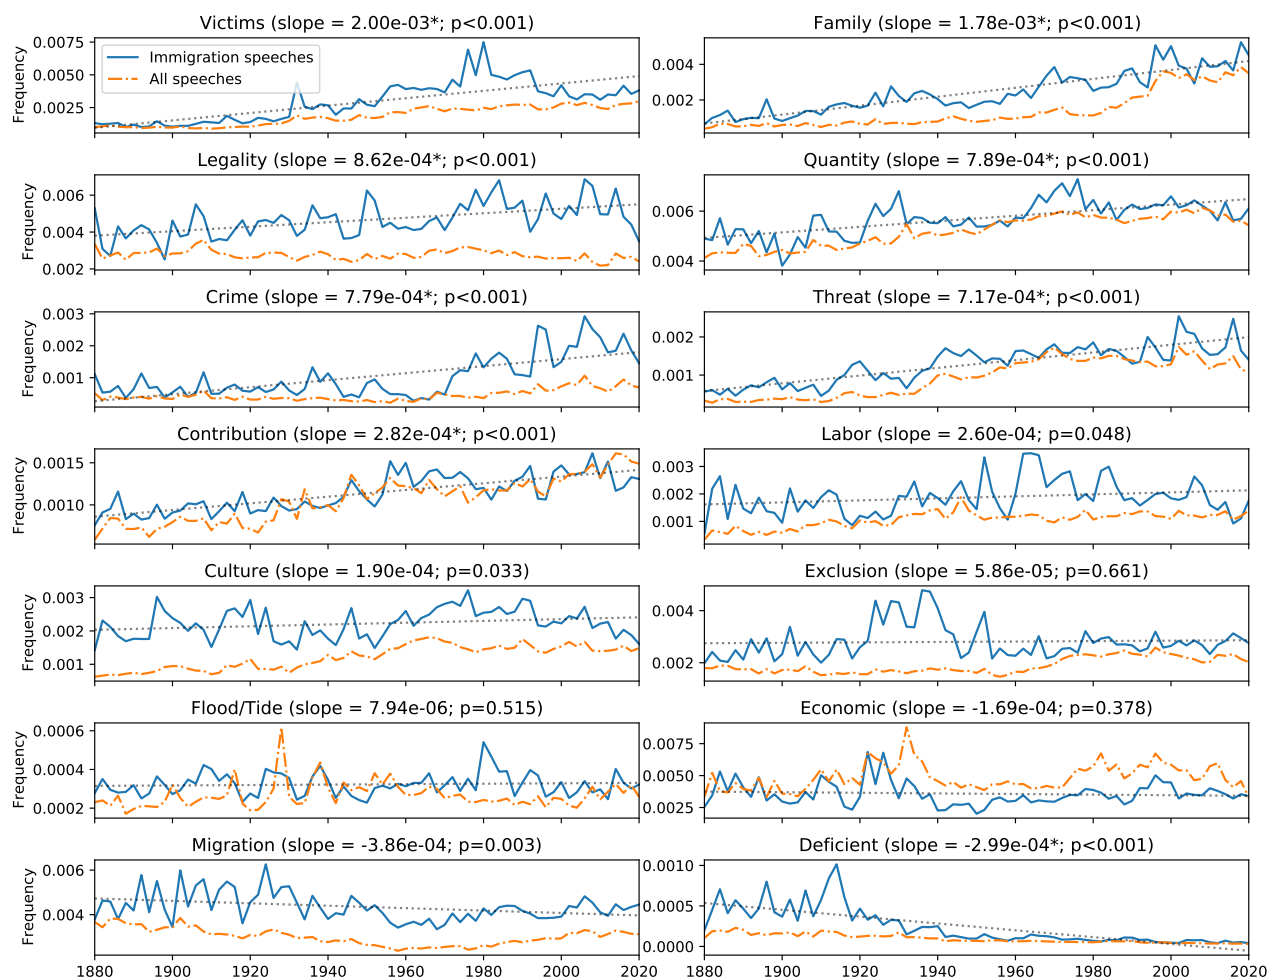

**Fig. S32.** Cumulative frequency of terms associated with each of our fourteen frames, both within speeches about immigration (blue solid line), and in all speeches (orange broken line). The dashed line and p-values in titles refer to the slope of a linear regression fit to the frequency within immigration speeches over time. As an illustrative example, note that the *Economics* frame is common within speeches about immigration, and has remained so over the entire 150 year time period, but is actually mentioned more frequently in all speeches, especially since the 1920s. By contrast, terms related to crime have surged in frequency in speeches about immigration, with a far less dramatic increase in overall frequency across all speeches. Note that each plot is scaled individually such that detailed variation is visible.

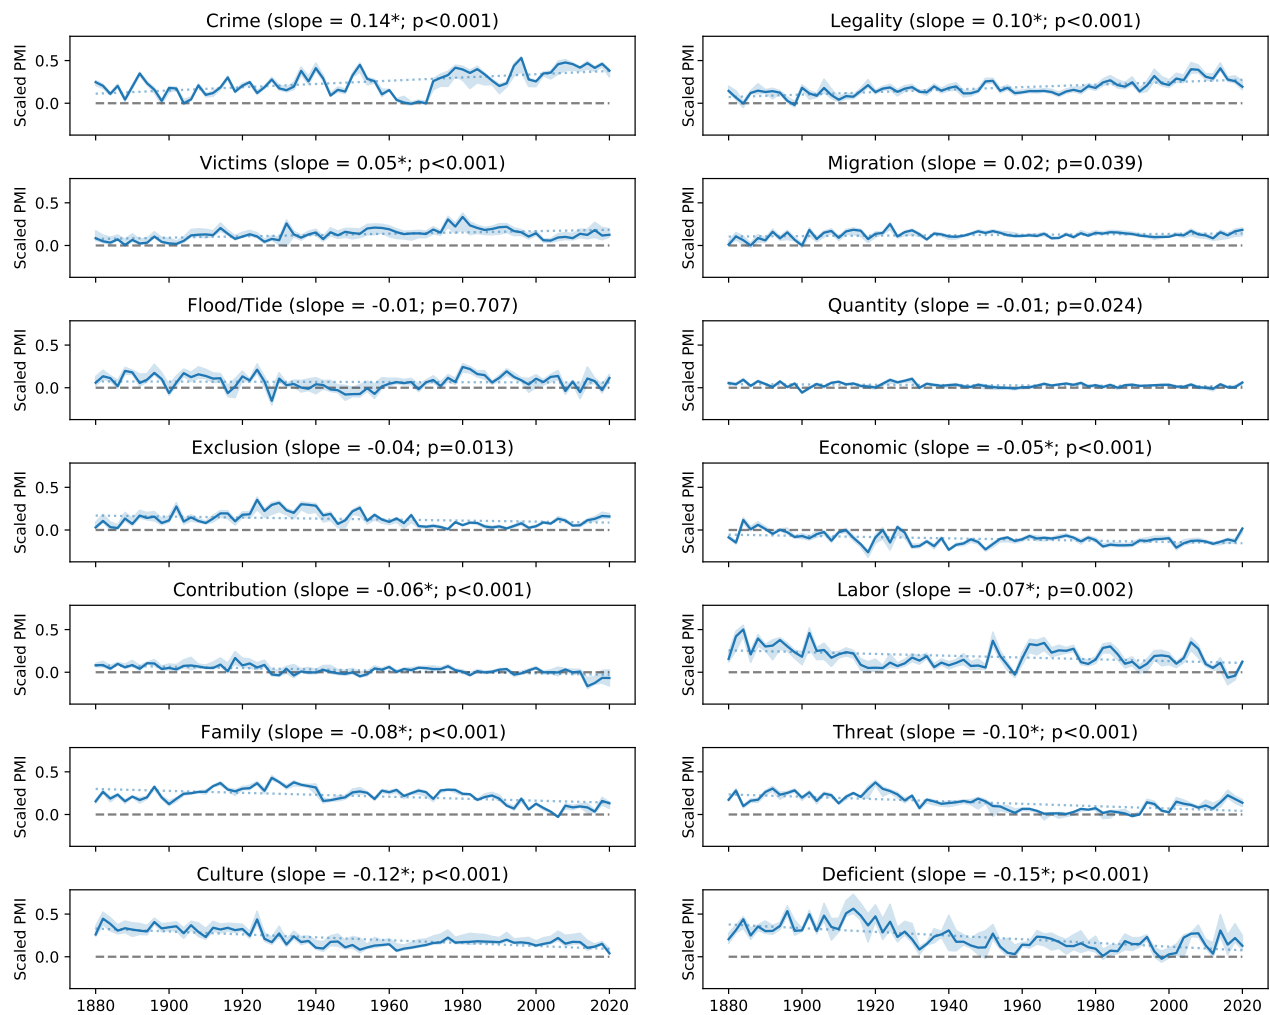

**Fig. S33.** Scaled PMI using all speeches, with slopes estimated over the entire time period from 1880-2020. Slopes are scaled such that a slope of 1.0 would be equivalent to moving from 0 to 1 in PMI over the entire time series. Asterisks indicate significant changes after applying a Bonferroni correction (with uncorrected p-values listed). Shaded bands indicate the area from minimum to maximum scaled PMI obtained from re-computing values when excluding out one term at a time from the terms associated with a given frame (showing that no single term has a massive effect on the slope, though significance would change in some cases if we took the maximum p-value). Note that all plots are scaled consistently and are comparable in absolute terms.

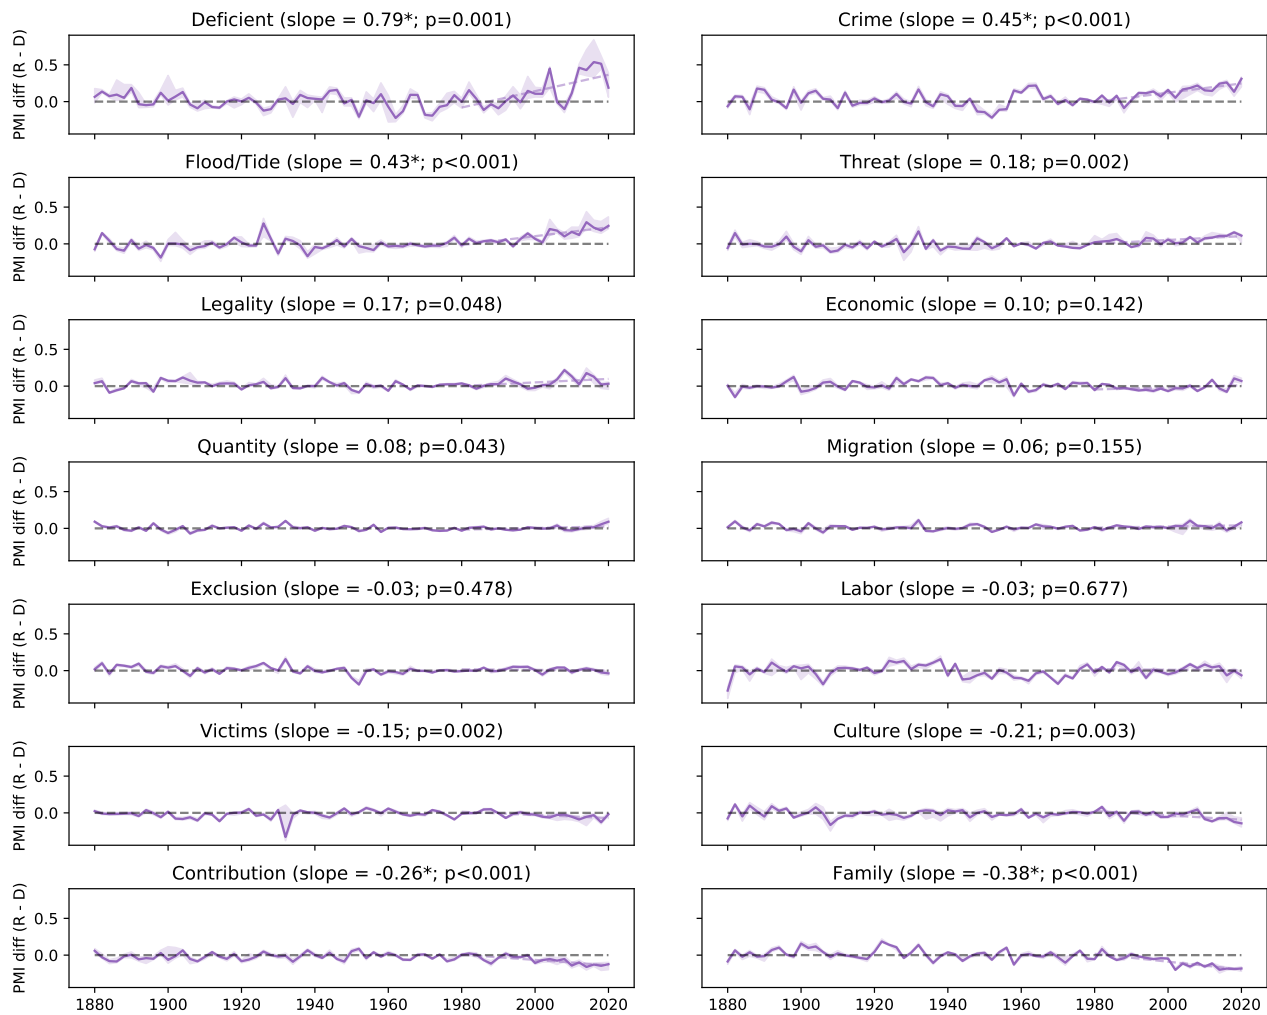

**Fig. S34.** Differences in scaled PMI (Republicans - Democrats), with slopes estimated over the period of partisanship from 1970-2020. Slopes are scaled such that a slope of 1.0 would be equivalent to moving from 0 to 1 in PMI over the entire time series. As above, asterisks show statistical significance after Bonferroni correction, and bands show the minimum and maximum scaled PMI when leaving out one word at a time.

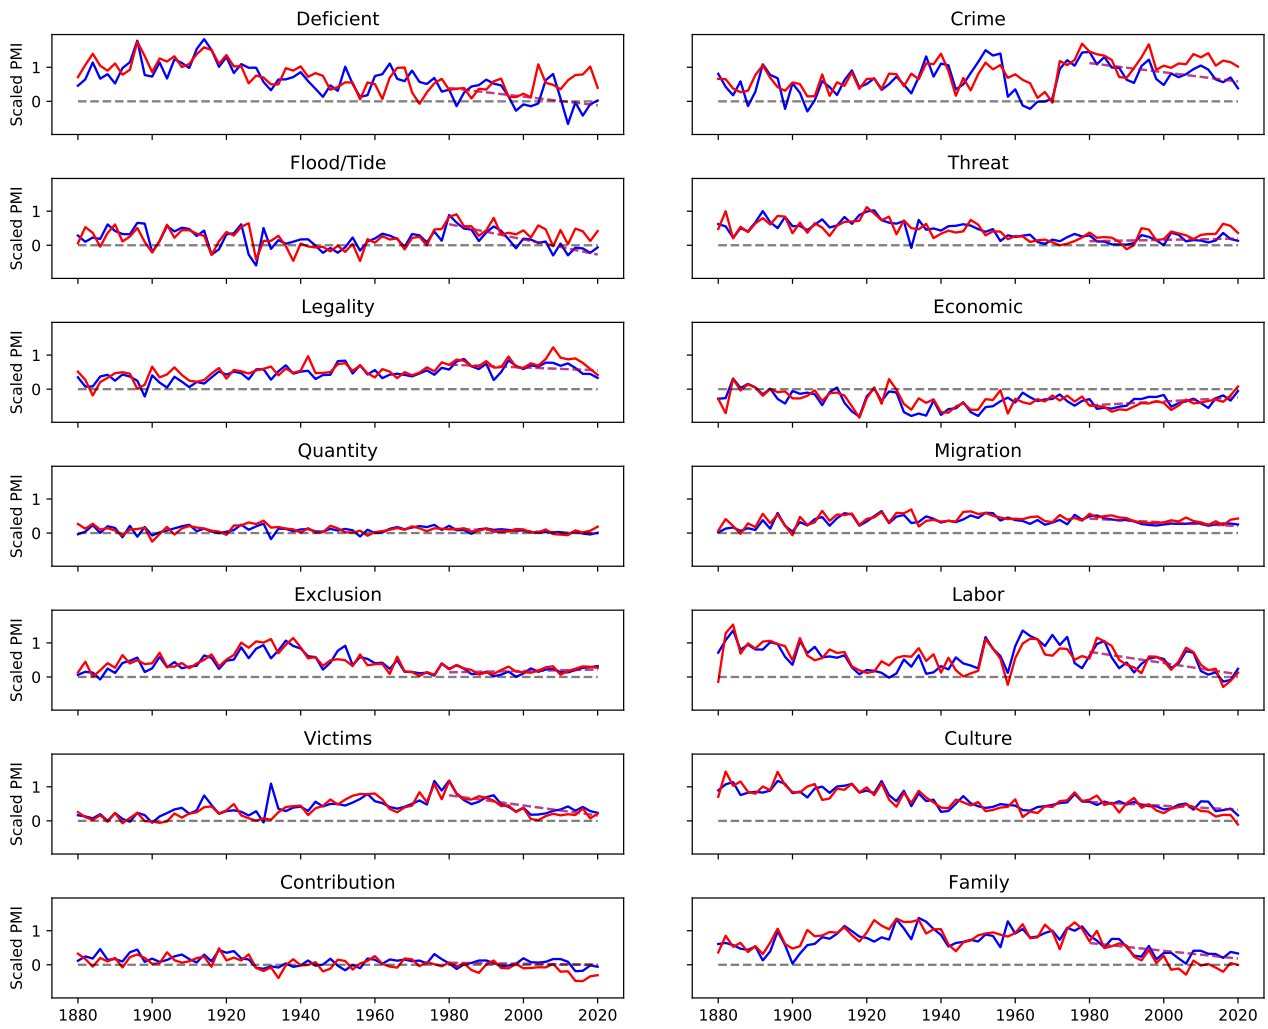

Fig. S35. Scaled PMI computed separately by party.

631 **References**

632 1. M Gentzkow, JM Shapiro, M Taddy, *Congressional Record for the 43rd-114th Congresses: Parsed Speeches and Phrase*  
633 *Counts*. (Stanford Libraries, Palo Alto, CA), (2018).

634 2. D Card, AE Boydston, JH Gross, P Resnik, NA Smith, The media frames corpus: Annotations of frames across issues. in  
635 *Proceedings of ACL*. (2015).

636 3. Y Luo, D Card, D Jurafsky, Detecting stance in media on global warming. in *Findings of the Association for Computational*  
637 *Linguistics: EMNLP 2020*. (2020).

638 4. S Wang, C Manning, Baselines and bigrams: Simple, good sentiment and topic classification. in *Proceedings of the ACL*.  
639 pp. 90–94 (2012).

640 5. A Noorani, Retiring Miami Rep. Ros-Lehtinen’s set an example for tackling immigration issues. *Miami Her.* (2018)  
641 Accessed 2022-05-07.

642 6. J Preston, The immigration crisis Jeff Sessions leaves behind. *The Marshall Proj.* (2018).

643 7. SD Team, Stan modeling language users guide and reference manual 2.27 (2019).

644 8. R Carroll, JB Lewis, J Lo, KT Poole, H Rosenthal, Measuring bias and uncertainty in DW-NOMINATE ideal point  
645 estimates via the parametric bootstrap. *Polit. Analysis* **17**, 261–275 (2009).

646 9. JB Lewis, et al., Voteview: Congressional roll-call votes database. <https://voteview.com> (2022).

647 10. DM Blei, AY Ng, MI Jordan, Latent dirichlet allocation. *J. Mach. Learn. Res.* **3**, 993–1022 (2003).

648 11. T Mikolov, I Sutskever, K Chen, GS Corrado, J Dean, Distributed representations of words and phrases and their  
649 compositionality. in *Advances in Neural Information Processing Systems*, eds. CJC Burges, L Bottou, M Welling, Z  
650 Ghahramani, KQ Weinberger. (Curran Associates, Inc.), Vol. 26, (2013).

651 12. J Devlin, MW Chang, K Lee, K Toutanova, BERT: Pre-training of deep bidirectional transformers for language  
652 understanding. in *Proceedings of NAACL*. (2019).

653 13. Wenjun Qiu, Y Xu, HistBERT: A pre-trained language model for diachronic lexical semantic analysis. *arXiv:2202.03612*  
654 (2022).
